# Supplementary material for: Burrows of the Semi-Terrestrial Crab Ucides cordatus Enhance CO2 Release in a North Brazilian Mangrove Forest
Source: PLOS journal article supplement (doi:10.1371/journal.pone.0109532), 2014-10-14
Supplement: S7 (10.1371/journal.pone.0109532.s007) [file journal.pone.0109532.s007]

### **Data S1: Complete data set used for statistical analyses**

- Data set of distance of water inside burrow to surface and the burrow diameter (p.2)
- Data set of rH values of burrow water (p. 5)
- Data set of rH values of excavated sediment (p. 7)
- Data set of CO<sub>2</sub> efflux rates of burrows (F<sub>b</sub>) (p. 9)
- Data set of control CO<sub>2</sub> efflux rates (plain sediment) (p. 17)
- Data set of carapace widths of *Ucides cordatus* (p. 29)
- Data set of crab respiration (p. 30)
- Data set of rH values in the burrow wall sediment (BWS) (p. 33)
- Data set of rH values in plain sediment (control) (p. 64)

# **Data set of distance of water inside burrow to surface and the burrow diameter**

| Crab burrow | Time  | Distance of water inside burrow to surface (cm) | Burrow diameter (cm) |
|-------------|-------|-------------------------------------------------|----------------------|
| 1           | April | 17                                              | 9.55                 |
| 2           | April | 14                                              | 7.5                  |
| 3           | April | 14                                              | 4.95                 |
| 4           | April | 14                                              | 6.75                 |
| 5           | April | 7.5                                             | 5                    |
| 6           | April | 7                                               | 9.05                 |
| 7           | April | 14                                              | 4.05                 |
| 8           | April | 14                                              | 6.1                  |
| 9           | April | 19                                              | 7.45                 |
| 10          | April | 12                                              | 5.9                  |
| 11          | April | 13                                              | 6.55                 |
| 12          | April | 14                                              | 6.95                 |
| 13          | April | 26                                              | 6.05                 |
| 14          | April | 17                                              | 5.4                  |
| 15          | April | 17                                              | 5.45                 |
| 16          | April | 20                                              | 4.9                  |
| 17          | April | 23                                              | 5                    |
| 18          | April | 20                                              | 6.85                 |
| 19          | April | 21                                              | 6.8                  |
| 20          | April | 20                                              | 8.65                 |
| 21          | April | 17                                              | 7.1                  |
| 22          | April | 10                                              | 9.4                  |
| 23          | April | 20                                              | 6.05                 |
| 24          | April | 18                                              | 7                    |
| 25          | April | NA/0 floor completely covered by rain           | NA                   |
| 26          | April | NA/0 floor completely covered by rain           | NA                   |
| 27          | April | NA/0 floor completely covered by rain           | NA                   |
| 28          | April | NA/0 floor completely covered by rain           | NA                   |
| 29          | April | NA/0 floor completely covered by rain           | NA                   |
| 30          | April | NA/0 floor completely covered by rain           | NA                   |

|    |           |      |      |
|----|-----------|------|------|
| 31 | July      | 11   | 5.4  |
| 32 | July      | 5    | 5    |
| 33 | July      | 7    | 5.15 |
| 34 | July      | 10   | 5.65 |
| 35 | July      | 10   | 5.6  |
| 36 | July      | 13   | 4.85 |
| 37 | July      | 7    | 7    |
| 38 | July      | 8    | 6    |
| 39 | July      | 13   | 3.35 |
| 40 | July      | 18   | 5.5  |
| 41 | July      | 17   | 6.5  |
| 42 | July      | 21   | 6.1  |
| 43 | July      | 21   | 5.45 |
| 44 | July      | 21   | 6.15 |
| 45 | July      | 19   | 6.25 |
| 46 | July      | 21   | 6.3  |
| 47 | July      | 17   | 6.05 |
| 48 | July      | 17   | 6.9  |
| 49 | July      | 45   | 7.35 |
| 50 | July      | 50   | 5.35 |
| 51 | July      | 37   | 6.95 |
| 52 | July      | 47   | 5.95 |
| 53 | July      | 45   | 7.35 |
| 54 | July      | 40   | 5.55 |
| 55 | September | 13   | 6.5  |
| 56 | September | 10   | 6.4  |
| 57 | September | 11   | 6.25 |
| 58 | September | 13.5 | 6.6  |
| 59 | September | 11   | 5.8  |
| 60 | September | 18   | 5.8  |
| 61 | September | 11   | 7.35 |
| 62 | September | 12   | 5.5  |
| 63 | September | 23   | 6.35 |

|    |           |    |      |
|----|-----------|----|------|
| 64 | September | 22 | 6.65 |
| 65 | September | 22 | 5.25 |
| 66 | September | 18 | 5.9  |
| 67 | September | 24 | 6.55 |
| 68 | September | NA | NA   |
| 69 | September | 29 | 6.6  |
| 70 | September | 24 | 6.1  |
| 71 | September | 23 | 6.45 |
| 72 | September | 20 | 6.3  |
| 73 | September | 24 | 5.5  |
| 74 | September | 20 | 5.65 |
| 75 | October   | 30 | 7.35 |
| 76 | October   | 27 | 6.9  |
| 77 | October   | 29 | 6.75 |
| 78 | October   | 30 | 7.25 |
| 79 | October   | 32 | 5.8  |
| 80 | October   | 32 | 5.55 |
| 81 | October   | 31 | 5.5  |
| 82 | October   | 35 | 4.55 |
| 83 | October   | 46 | 4.9  |
| 84 | October   | 50 | 4.8  |
| 86 | October   | 30 | 4.65 |

### Data set of rH values of burrow water

| Crab burrow | Time      | rH    |
|-------------|-----------|-------|
| 1           | April     | 16.65 |
| 2           | April     | 11.46 |
| 3           | April     | 8.67  |
| 4           | April     | 9.53  |
| 5           | April     | 14.14 |
| 6           | April     | 14.7  |
| 7           | April     | 16.66 |
| 9           | April     | 14.72 |
| 13          | April     | 23.45 |
| 15          | April     | 14.32 |
| 16          | April     | 17.56 |
| 17          | April     | 24.29 |
| 18          | April     | 15.74 |
| 19          | April     | 9.36  |
| 21          | April     | 17.61 |
| 22          | April     | 18.1  |
| 25          | April     | 18.77 |
| 26          | April     | 15.69 |
| 27          | April     | 18.6  |
| 28          | April     | 17.4  |
| 29          | April     | 20.39 |
| 30          | April     | 18.81 |
| 31          | July      | 17.87 |
| 32          | July      | 17.46 |
| 33          | July      | 17.12 |
| 34          | July      | 17.76 |
| 35          | July      | 17.2  |
| 36          | July      | 17.01 |
| 37          | July      | 18.76 |
| 38          | July      | 18.24 |
| 39          | July      | 16.92 |
| 40          | July      | 23.32 |
| 41          | July      | 16.19 |
| 42          | July      | 16.61 |
| 44          | July      | 17.61 |
| 45          | July      | 15.84 |
| 46          | July      | 16.13 |
| 47          | July      | 18.95 |
| 48          | July      | 15.71 |
| 49          | July      | 18.61 |
| 50          | July      | 13.89 |
| 51          | July      | 10.96 |
| 52          | July      | 12.66 |
| 54          | July      | 15.61 |
| 55          | September | 20.45 |
| 56          | September | 17.37 |
| 57          | September | 16.55 |
| 58          | September | 14.99 |
| 59          | September | 20.09 |

|    |           |       |
|----|-----------|-------|
| 60 | September | 11.35 |
| 61 | September | 18.79 |
| 62 | September | 17.93 |
| 63 | September | 17.04 |
| 64 | September | 18.8  |
| 65 | September | 17.33 |
| 66 | September | 18.32 |
| 67 | September | 28.3  |
| 69 | September | 15.45 |
| 70 | September | 18.22 |
| 71 | September | 17.55 |
| 76 | October   | 17.25 |
| 77 | October   | 18.46 |
| 78 | October   | 15.48 |
| 79 | October   | 13.35 |
| 80 | October   | 15.12 |
| 81 | October   | 13.77 |
| 82 | October   | 14.53 |
| 83 | October   | 19.39 |
| 86 | October   | 18.24 |

### Data set of rH values of excavated sediment

| Crab burrow | Time  | rH    |
|-------------|-------|-------|
| 1           | April | 16.89 |
| 2           | April | 9.57  |
| 3           | April | 8.68  |
| 4           | April | 10.38 |
| 5           | April | 20.61 |
| 6           | April | 14.9  |
| 7           | April | 16.97 |
| 8           | April | 25.8  |
| 9           | April | 15.77 |
| 13          | April | 13.11 |
| 14          | April | 14.58 |
| 15          | April | 14.65 |
| 16          | April | 17.74 |
| 17          | April | 19.22 |
| 18          | April | 14.53 |
| 19          | April | 11.97 |
| 20          | April | 15.85 |
| 21          | April | 15.52 |
| 22          | April | 17.64 |
| 25          | April | 18.94 |
| 26          | April | 13.85 |
| 27          | April | 10.6  |
| 28          | April | 12.82 |
| 29          | April | 15.26 |
| 30          | April | 21.19 |
| 31          | July  | 16.28 |
| 32          | July  | 15.48 |
| 33          | July  | 10.36 |
| 34          | July  | 15.27 |
| 35          | July  | 11.13 |
| 36          | July  | 15.92 |
| 37          | July  | 24.64 |
| 38          | July  | 14.03 |
| 39          | July  | 17.48 |
| 40          | July  | 17    |
| 41          | July  | 14.55 |
| 42          | July  | 12.63 |
| 43          | July  | 15.2  |
| 44          | July  | 20.26 |
| 45          | July  | 15.78 |
| 46          | July  | 17.35 |
| 47          | July  | 13.68 |
| 48          | July  | 15.31 |
| 49          | July  | 15.19 |
| 50          | July  | 20.65 |
| 51          | July  | 14.46 |
| 52          | July  | 24.34 |
| 53          | July  | 13.16 |
| 54          | July  | 17.08 |

|    |           |       |
|----|-----------|-------|
| 55 | September | 18.91 |
| 56 | September | 18.35 |
| 57 | September | 16.29 |
| 58 | September | 16.38 |
| 59 | September | 20.61 |
| 60 | September | 13.01 |
| 61 | September | 16.96 |
| 62 | September | 13.91 |
| 63 | September | 15.74 |
| 64 | September | 15.47 |
| 65 | September | 20.45 |
| 66 | September | 10.03 |
| 67 | September | 15.1  |
| 68 | September | 12.5  |
| 69 | September | 16.96 |
| 70 | September | 16.65 |
| 71 | September | 14.05 |
| 75 | October   | 20.12 |
| 76 | October   | 14.8  |
| 77 | October   | 16.88 |
| 78 | October   | 18.07 |
| 79 | October   | 13.8  |
| 80 | October   | 18.49 |
| 81 | October   | 17.24 |
| 82 | October   | 24.78 |
| 83 | October   | 16.11 |
| 84 | October   | 13.41 |
| 85 | October   | 20.62 |
| 86 | October   | 16.63 |



## Data set of CO<sub>2</sub> efflux rates of burrows (F<sub>b</sub>)

Some burrows or measurements did not yield a value due to technical difficulties.

| Crab burrow | Time  | Measurement | F <sub>b</sub> (μmol m <sup>-2</sup> s <sup>-1</sup> ) |
|-------------|-------|-------------|--------------------------------------------------------|
| 1           | April | 1           | 7.0084937                                              |
| 1           | April | 2           | 5.6428533                                              |
| 1           | April | 3           | 6.0061026                                              |
| 1           | April | 4           | 5.7149996                                              |
| 1           | April | 5           | 6.0426175                                              |
| 2           | April | 1           | 3.9364265                                              |
| 2           | April | 2           | 3.798566                                               |
| 2           | April | 3           | 3.823926                                               |
| 2           | April | 4           | 3.8476071                                              |
| 2           | April | 5           | 3.7928506                                              |
| 3           | April | 1           | 7.1028333                                              |
| 3           | April | 2           | 4.3648481                                              |
| 3           | April | 3           | 3.8084219                                              |
| 3           | April | 4           | 3.6478559                                              |
| 3           | April | 5           | 4.8317249                                              |
| 4           | April | 1           | 4.6700758                                              |
| 4           | April | 2           | 3.9146601                                              |
| 4           | April | 3           | 3.6834689                                              |
| 4           | April | 4           | 3.3753889                                              |
| 4           | April | 5           | 3.4210035                                              |
| 5           | April | 1           | 16.5310568                                             |
| 5           | April | 2           | 11.8720165                                             |
| 5           | April | 3           | 8.1079703                                              |
| 5           | April | 4           | 7.8082039                                              |
| 5           | April | 5           | 8.4852839                                              |
| 6           | April | 1           | 1.2356676                                              |
| 6           | April | 2           | 1.2809451                                              |
| 6           | April | 3           | 1.2298262                                              |
| 6           | April | 4           | 1.2693422                                              |
| 7           | April | 1           | 5.1555658                                              |
| 7           | April | 2           | 6.3735045                                              |
| 7           | April | 3           | 5.6000888                                              |
| 7           | April | 4           | 7.6902971                                              |
| 7           | April | 5           | 6.2494824                                              |
| 8           | April | 1           | 4.9603861                                              |
| 8           | April | 2           | 5.2241666                                              |
| 8           | April | 3           | 4.7416246                                              |
| 8           | April | 4           | 5.7472462                                              |
| 8           | April | 5           | 5.2251445                                              |
| 9           | April | 1           | 3.5749822                                              |
| 9           | April | 2           | 3.555753                                               |
| 9           | April | 3           | 8.122535                                               |
| 9           | April | 4           | 6.8358688                                              |
| 9           | April | 5           | 12.8109185                                             |
| 10          | April | 1           | 17.3017181                                             |
| 10          | April | 2           | 12.4427502                                             |
| 10          | April | 3           | 14.6416235                                             |
| 10          | April | 4           | 14.440647                                              |

|    |       |   |            |
|----|-------|---|------------|
| 10 | April | 5 | 12.4029061 |
| 11 | April | 1 | 12.5453857 |
| 11 | April | 2 | 6.0557769  |
| 11 | April | 3 | 5.6074497  |
| 11 | April | 4 | 5.0129583  |
| 11 | April | 5 | 8.238401   |
| 12 | April | 1 | 4.2453905  |
| 12 | April | 2 | 3.7833649  |
| 12 | April | 3 | 3.7277011  |
| 12 | April | 4 | 3.3911701  |
| 12 | April | 5 | 3.3032109  |
| 13 | April | 1 | 21.7928085 |
| 13 | April | 2 | 15.9614882 |
| 13 | April | 3 | 12.3640646 |
| 13 | April | 4 | 11.4571324 |
| 13 | April | 5 | 5.6470903  |
| 14 | April | 1 | 12.4834138 |
| 14 | April | 2 | 8.3188061  |
| 14 | April | 3 | 8.7872085  |
| 14 | April | 4 | 8.8212808  |
| 14 | April | 5 | 7.7326137  |
| 15 | April | 1 | 6.2425457  |
| 15 | April | 2 | 5.3558445  |
| 15 | April | 3 | 4.8268969  |
| 15 | April | 4 | 5.6812491  |
| 15 | April | 5 | 5.9761293  |
| 16 | April | 1 | 5.9588629  |
| 16 | April | 2 | 5.1417803  |
| 16 | April | 3 | 5.0765762  |
| 16 | April | 4 | 5.9391077  |
| 16 | April | 5 | 7.3855009  |
| 17 | April | 1 | 13.3930358 |
| 17 | April | 2 | 7.1586053  |
| 17 | April | 3 | 10.3159851 |
| 17 | April | 4 | 8.5797187  |
| 17 | April | 5 | 5.5790319  |
| 18 | April | 1 | 16.2705249 |
| 18 | April | 2 | 13.6091419 |
| 18 | April | 3 | 18.0655279 |
| 18 | April | 4 | 12.4821757 |
| 19 | April | 1 | 11.4462942 |
| 19 | April | 2 | 6.2625821  |
| 19 | April | 3 | 7.5772165  |
| 19 | April | 4 | 7.1015004  |
| 19 | April | 5 | 5.9171708  |
| 20 | April | 1 | 8.9700696  |
| 20 | April | 3 | 22.8201743 |
| 20 | April | 4 | 15.1988954 |
| 20 | April | 5 | 8.7488757  |
| 21 | April | 1 | 5.6759875  |
| 21 | April | 2 | 4.8704224  |
| 21 | April | 3 | 6.4586139  |

|    |       |   |            |
|----|-------|---|------------|
| 21 | April | 4 | 4.207868   |
| 21 | April | 5 | 4.8705566  |
| 22 | April | 1 | 2.081937   |
| 22 | April | 2 | 2.1455084  |
| 22 | April | 3 | 2.2497082  |
| 22 | April | 4 | 2.0885097  |
| 22 | April | 5 | 2.1055682  |
| 23 | April | 1 | 4.3676557  |
| 23 | April | 2 | 4.2381849  |
| 23 | April | 3 | 4.4608288  |
| 23 | April | 4 | 4.621497   |
| 23 | April | 5 | 4.3139194  |
| 24 | April | 1 | 12.6714791 |
| 24 | April | 2 | 8.7415877  |
| 24 | April | 3 | 6.4904542  |
| 24 | April | 4 | 6.2085183  |
| 31 | July  | 1 | 3.5696977  |
| 31 | July  | 2 | 3.8101643  |
| 31 | July  | 3 | 3.9753309  |
| 31 | July  | 4 | 3.6263326  |
| 31 | July  | 5 | 5.0679486  |
| 32 | July  | 1 | 3.4954726  |
| 32 | July  | 2 | 3.327553   |
| 32 | July  | 3 | 2.8990743  |
| 32 | July  | 4 | 3.5628774  |
| 32 | July  | 5 | 3.3323276  |
| 33 | July  | 1 | 2.065765   |
| 33 | July  | 2 | 2.0034049  |
| 33 | July  | 3 | 2.4116405  |
| 33 | July  | 4 | 2.6948141  |
| 33 | July  | 5 | 2.9032352  |
| 34 | July  | 1 | 3.6263601  |
| 34 | July  | 2 | 2.493836   |
| 34 | July  | 3 | 2.2374192  |
| 34 | July  | 4 | 2.3499559  |
| 34 | July  | 5 | 3.2301003  |
| 35 | July  | 1 | 2.6541471  |
| 35 | July  | 2 | 2.1592119  |
| 35 | July  | 3 | 1.9295006  |
| 35 | July  | 4 | 1.732503   |
| 35 | July  | 5 | 2.3491852  |
| 36 | July  | 1 | 12.941279  |
| 36 | July  | 2 | 9.7955249  |
| 36 | July  | 3 | 13.6200276 |
| 36 | July  | 4 | 9.9558967  |
| 36 | July  | 5 | 7.6667279  |
| 37 | July  | 1 | 4.3252719  |
| 37 | July  | 2 | 4.2274051  |
| 37 | July  | 3 | 3.784737   |
| 37 | July  | 4 | 4.7542489  |
| 37 | July  | 5 | 7.1800688  |
| 38 | July  | 1 | 6.4278592  |

|    |      |   |            |
|----|------|---|------------|
| 38 | July | 2 | 6.8889414  |
| 38 | July | 3 | 5.5711086  |
| 38 | July | 4 | 3.9486678  |
| 38 | July | 5 | 5.2466302  |
| 39 | July | 1 | 1.7421829  |
| 39 | July | 2 | 2.424683   |
| 39 | July | 3 | 1.959019   |
| 39 | July | 4 | 2.5217678  |
| 39 | July | 5 | 2.1274259  |
| 40 | July | 1 | 4.281536   |
| 40 | July | 2 | 7.5483667  |
| 40 | July | 3 | 7.0132038  |
| 40 | July | 4 | 3.554771   |
| 40 | July | 5 | 6.0497054  |
| 41 | July | 1 | 7.1575819  |
| 41 | July | 2 | 8.3445894  |
| 41 | July | 3 | 7.7859129  |
| 41 | July | 4 | 7.5467455  |
| 41 | July | 5 | 7.4041741  |
| 42 | July | 1 | 2.4611495  |
| 42 | July | 2 | 2.61807    |
| 42 | July | 3 | 2.3443149  |
| 42 | July | 4 | 2.480643   |
| 42 | July | 5 | 2.0866537  |
| 43 | July | 1 | 3.7188617  |
| 43 | July | 2 | 5.7655617  |
| 43 | July | 3 | 4.7496716  |
| 43 | July | 4 | 3.868029   |
| 43 | July | 5 | 3.6447265  |
| 44 | July | 1 | 7.1499321  |
| 44 | July | 2 | 6.4563293  |
| 44 | July | 3 | 8.0369799  |
| 44 | July | 4 | 8.3372346  |
| 44 | July | 5 | 6.7076589  |
| 45 | July | 1 | 18.080208  |
| 45 | July | 2 | 12.6141666 |
| 45 | July | 3 | 12.2811517 |
| 45 | July | 4 | 9.8340701  |
| 45 | July | 5 | 8.9337729  |
| 46 | July | 1 | 1.8396279  |
| 46 | July | 2 | 2.4161107  |
| 46 | July | 3 | 2.6225395  |
| 46 | July | 4 | 4.1515543  |
| 46 | July | 5 | 1.7876338  |
| 47 | July | 1 | 1.5362443  |
| 47 | July | 2 | 1.4491783  |
| 47 | July | 3 | 1.0922951  |
| 47 | July | 4 | 1.5449702  |
| 47 | July | 5 | 1.7521747  |
| 48 | July | 1 | 14.5584716 |
| 48 | July | 2 | 13.3508653 |
| 48 | July | 3 | 11.4445574 |

|    |           |   |            |
|----|-----------|---|------------|
| 48 | July      | 4 | 11.6656969 |
| 48 | July      | 5 | 11.3420101 |
| 49 | July      | 1 | 41.5843997 |
| 49 | July      | 2 | 34.8142833 |
| 49 | July      | 3 | 31.621091  |
| 49 | July      | 4 | 31.2780751 |
| 49 | July      | 5 | 29.3090873 |
| 50 | July      | 1 | 15.0148372 |
| 50 | July      | 2 | 12.5467918 |
| 50 | July      | 3 | 11.0222378 |
| 50 | July      | 4 | 16.2393282 |
| 50 | July      | 5 | 13.5139257 |
| 51 | July      | 1 | 32.5869527 |
| 51 | July      | 2 | 28.1993525 |
| 51 | July      | 3 | 27.8572322 |
| 51 | July      | 4 | 24.092388  |
| 51 | July      | 5 | 22.3120242 |
| 52 | July      | 1 | 14.4071475 |
| 52 | July      | 2 | 8.5266109  |
| 52 | July      | 3 | 8.3965641  |
| 52 | July      | 4 | 14.0460223 |
| 52 | July      | 5 | 9.5239026  |
| 53 | July      | 1 | 35.7766827 |
| 53 | July      | 2 | 36.1471689 |
| 53 | July      | 3 | 33.3692798 |
| 53 | July      | 4 | 38.46252   |
| 53 | July      | 5 | 37.742393  |
| 54 | July      | 2 | 40.1682508 |
| 54 | July      | 3 | 37.7842827 |
| 54 | July      | 4 | 33.8858889 |
| 54 | July      | 5 | 34.2510152 |
| 55 | September | 1 | 2.6798773  |
| 55 | September | 2 | 1.1398294  |
| 55 | September | 3 | 0.9059706  |
| 55 | September | 4 | 1.2324487  |
| 55 | September | 5 | 1.138443   |
| 56 | September | 1 | 3.1880116  |
| 56 | September | 2 | 3.1870945  |
| 56 | September | 3 | 3.128654   |
| 56 | September | 4 | 3.1977758  |
| 56 | September | 5 | 3.3307884  |
| 57 | September | 1 | 3.726173   |
| 57 | September | 2 | 7.1444949  |
| 57 | September | 3 | 2.9173161  |
| 57 | September | 4 | 3.8683356  |
| 57 | September | 5 | 4.2767747  |
| 58 | September | 1 | 11.8377672 |
| 58 | September | 2 | 9.1618616  |
| 58 | September | 3 | 12.2781286 |
| 58 | September | 4 | 12.9841886 |
| 58 | September | 5 | 11.3767585 |
| 59 | September | 1 | 3.244799   |

|    |           |   |            |
|----|-----------|---|------------|
| 59 | September | 2 | 3.4301614  |
| 59 | September | 3 | 3.4330299  |
| 59 | September | 4 | 3.6046944  |
| 59 | September | 5 | 3.0186076  |
| 60 | September | 1 | 5.2933536  |
| 60 | September | 2 | 3.9404225  |
| 60 | September | 3 | 4.7019616  |
| 60 | September | 4 | 4.5865632  |
| 60 | September | 5 | 5.3769336  |
| 61 | September | 1 | 1.9801158  |
| 61 | September | 2 | 2.1912318  |
| 61 | September | 3 | 2.2838846  |
| 61 | September | 4 | 2.6585388  |
| 61 | September | 5 | 2.440157   |
| 62 | September | 1 | 4.612161   |
| 62 | September | 2 | 6.0742573  |
| 62 | September | 3 | 3.6716009  |
| 62 | September | 4 | 4.477764   |
| 62 | September | 5 | 4.1825886  |
| 63 | September | 1 | 14.2655041 |
| 63 | September | 2 | 6.4905757  |
| 63 | September | 3 | 4.616546   |
| 63 | September | 4 | 4.1244067  |
| 63 | September | 5 | 6.8646528  |
| 64 | September | 1 | 8.3287744  |
| 64 | September | 2 | 8.3154796  |
| 64 | September | 3 | 8.6431362  |
| 64 | September | 4 | 6.8179552  |
| 64 | September | 5 | 7.0228286  |
| 65 | September | 1 | 6.8107395  |
| 65 | September | 2 | 7.5131295  |
| 65 | September | 3 | 8.0544905  |
| 65 | September | 4 | 7.2280907  |
| 65 | September | 5 | 7.9474049  |
| 66 | September | 1 | 6.8000681  |
| 66 | September | 2 | 7.3429933  |
| 66 | September | 3 | 7.898635   |
| 66 | September | 4 | 6.813846   |
| 66 | September | 5 | 6.5760949  |
| 67 | September | 1 | 3.4999919  |
| 67 | September | 2 | 2.8146017  |
| 67 | September | 3 | 3.3490975  |
| 67 | September | 4 | 5.5002678  |
| 67 | September | 5 | 3.8689795  |
| 69 | September | 1 | 7.9934381  |
| 69 | September | 2 | 8.918983   |
| 69 | September | 3 | 12.0308275 |
| 69 | September | 4 | 8.6673564  |
| 69 | September | 5 | 9.2564161  |
| 70 | September | 1 | 5.1282215  |
| 70 | September | 2 | 5.2063334  |
| 70 | September | 3 | 6.2767877  |

|    |           |   |            |
|----|-----------|---|------------|
| 70 | September | 4 | 5.3320878  |
| 70 | September | 5 | 5.8268407  |
| 71 | September | 1 | 6.5350116  |
| 71 | September | 2 | 6.0100062  |
| 71 | September | 3 | 5.3676842  |
| 71 | September | 4 | 6.2700581  |
| 71 | September | 5 | 8.3366683  |
| 72 | September | 1 | 5.306254   |
| 72 | September | 2 | 5.5158915  |
| 72 | September | 3 | 5.6975925  |
| 72 | September | 4 | 5.3098439  |
| 72 | September | 5 | 5.8645286  |
| 73 | September | 1 | 3.4660631  |
| 73 | September | 2 | 3.1807906  |
| 73 | September | 3 | 3.1337351  |
| 73 | September | 4 | 3.7285413  |
| 73 | September | 5 | 3.6259786  |
| 74 | September | 1 | 3.55941    |
| 74 | September | 2 | 17.8639568 |
| 74 | September | 3 | 11.3921431 |
| 74 | September | 4 | 9.680552   |
| 74 | September | 5 | 11.2160779 |
| 75 | October   | 1 | 6.7331339  |
| 75 | October   | 2 | 5.3073742  |
| 75 | October   | 3 | 8.1232182  |
| 75 | October   | 4 | 5.9482654  |
| 75 | October   | 5 | 5.6234843  |
| 76 | October   | 1 | 8.8659164  |
| 76 | October   | 2 | 8.6455065  |
| 76 | October   | 3 | 7.5705047  |
| 76 | October   | 4 | 7.5427118  |
| 76 | October   | 5 | 7.2598173  |
| 77 | October   | 1 | 9.4962302  |
| 77 | October   | 2 | 7.6302471  |
| 77 | October   | 3 | 5.2035874  |
| 77 | October   | 4 | 5.5618363  |
| 77 | October   | 5 | 5.4561809  |
| 78 | October   | 1 | 9.3486774  |
| 78 | October   | 2 | 9.0515461  |
| 78 | October   | 3 | 8.5439095  |
| 78 | October   | 4 | 11.9804566 |
| 78 | October   | 5 | 10.581361  |
| 79 | October   | 1 | 5.017106   |
| 79 | October   | 2 | 4.9525669  |
| 79 | October   | 3 | 4.9057641  |
| 79 | October   | 4 | 4.9342853  |
| 79 | October   | 5 | 5.8170833  |
| 80 | October   | 1 | 7.5516971  |
| 80 | October   | 2 | 5.6571682  |
| 80 | October   | 3 | 6.1277598  |
| 80 | October   | 4 | 6.2843863  |
| 80 | October   | 5 | 7.2035084  |

|    |         |   |            |
|----|---------|---|------------|
| 81 | October | 1 | 2.5346882  |
| 81 | October | 2 | 2.2601188  |
| 81 | October | 3 | 3.2509097  |
| 81 | October | 4 | 3.5705355  |
| 81 | October | 5 | 6.7745144  |
| 82 | October | 1 | 1.3685963  |
| 82 | October | 2 | 1.5330542  |
| 82 | October | 3 | 3.1577839  |
| 82 | October | 4 | 1.6613109  |
| 82 | October | 5 | 2.1551276  |
| 83 | October | 1 | 4.2007062  |
| 83 | October | 2 | 3.8302672  |
| 83 | October | 3 | 3.6940417  |
| 83 | October | 4 | 5.315129   |
| 83 | October | 5 | 5.2474687  |
| 84 | October | 1 | 16.264476  |
| 84 | October | 2 | 12.6589088 |
| 84 | October | 3 | 12.0441423 |
| 84 | October | 4 | 13.7491943 |
| 84 | October | 5 | 12.6300833 |
| 86 | October | 1 | 3.5697742  |
| 86 | October | 2 | 4.9625191  |
| 86 | October | 3 | 3.1891278  |
| 86 | October | 4 | 3.4304562  |
| 86 | October | 5 | 1.5773547  |



### Data set of control CO<sub>2</sub> efflux rates (plain sediment)

In April one sampling site could not be measured.  
Occasionally measurement did not yield any result,  
because of technical difficulties.

| Time  | Sampling point | Measurement | CO <sub>2</sub> efflux rate of plain sediment ( $\mu\text{mol m}^{-2} \text{s}^{-1}$ ) |
|-------|----------------|-------------|----------------------------------------------------------------------------------------|
| April | 1              | 1           | 1.13921358                                                                             |
| April | 1              | 2           | 1.112771787                                                                            |
| April | 1              | 3           | 1.202517687                                                                            |
| April | 1              | 4           | 1.213407417                                                                            |
| April | 2              | 1           | 0.593992756                                                                            |
| April | 2              | 2           | 0.621491792                                                                            |
| April | 2              | 3           | 0.653988079                                                                            |
| April | 2              | 4           | 0.670763746                                                                            |
| April | 3              | 1           | 0.471732539                                                                            |
| April | 3              | 2           | 0.609743484                                                                            |
| April | 3              | 3           | 0.685344007                                                                            |
| April | 3              | 4           | 0.746645483                                                                            |
| April | 4              | 1           | 0.639523581                                                                            |
| April | 4              | 2           | 0.741012817                                                                            |
| April | 4              | 3           | 0.806009118                                                                            |
| April | 4              | 4           | 0.845608027                                                                            |
| April | 5              | 1           | 1.184742685                                                                            |
| April | 5              | 2           | 1.161585437                                                                            |
| April | 5              | 3           | 1.165557754                                                                            |
| April | 5              | 4           | 1.138900795                                                                            |
| April | 6              | 1           | 0.712363214                                                                            |
| April | 6              | 2           | 0.642647777                                                                            |
| April | 6              | 3           | 0.730958316                                                                            |
| April | 6              | 4           | 0.712225022                                                                            |
| April | 7              | 1           | 0.913457543                                                                            |
| April | 7              | 2           | 0.470923383                                                                            |
| April | 7              | 3           | 0.462110261                                                                            |
| April | 7              | 4           | 0.489674605                                                                            |

|       |    |   |             |
|-------|----|---|-------------|
| April | 8  | 1 | 0.593724573 |
| April | 8  | 2 | 0.608809695 |
| April | 8  | 3 | 0.609395043 |
| April | 8  | 4 | 0.639633416 |
| April | 9  | 1 | 0.491383252 |
| April | 9  | 2 | 0.62351525  |
| April | 9  | 3 | 0.498762223 |
| April | 9  | 4 | 0.463324437 |
| April | 10 | 1 | 0.568137494 |
| April | 10 | 2 | 0.53879773  |
| April | 10 | 3 | 0.443102696 |
| April | 10 | 4 | 0.563017637 |
| April | 11 | 1 | 0.455824015 |
| April | 11 | 2 | 0.491976295 |
| April | 11 | 3 | 0.488819309 |
| April | 11 | 4 | 0.476207222 |
| April | 12 | 1 | 0.612804444 |
| April | 12 | 2 | 0.604180099 |
| April | 12 | 3 | 0.749455157 |
| April | 12 | 4 | 0.926226683 |
| April | 13 | 1 | 0.298738269 |
| April | 13 | 2 | 0.310957841 |
| April | 13 | 3 | 0.309338762 |
| April | 13 | 4 | 0.325153937 |
| April | 14 | 1 | 2.922090383 |
| April | 14 | 2 | 2.890783693 |
| April | 14 | 3 | 3.074609574 |
| April | 14 | 4 | 3.081545307 |
| April | 15 | 1 | 0.467763142 |
| April | 15 | 2 | 0.478020027 |
| April | 15 | 3 | 0.389021439 |
| April | 15 | 4 | 0.362235008 |
| April | 16 | 1 | 0.618294412 |
| April | 16 | 2 | 0.644675673 |

|       |    |   |             |
|-------|----|---|-------------|
| April | 16 | 3 | 0.506672382 |
| April | 16 | 4 | 0.546956744 |
| April | 17 | 1 | 0.597168108 |
| April | 17 | 2 | 0.663555678 |
| April | 17 | 3 | 0.622166058 |
| April | 17 | 4 | 0.629392556 |
| April | 19 | 1 | 1.975411919 |
| April | 19 | 2 | 1.2354959   |
| April | 19 | 3 | 1.197056909 |
| April | 19 | 4 | 1.093025009 |
| April | 20 | 1 | 0.583994737 |
| April | 20 | 2 | 0.626962341 |
| April | 20 | 3 | 2.43802485  |
| April | 20 | 4 | 0.239367996 |
| April | 21 | 1 | 0.031221509 |
| April | 22 | 1 | 0.030525008 |
| April | 22 | 2 | 0.12504295  |
| April | 22 | 3 | 0.225399934 |
| April | 22 | 4 | 0.324817046 |
| April | 23 | 1 | 0.009045701 |
| April | 23 | 2 | 0.02349414  |
| April | 23 | 3 | 0.032714845 |
| April | 24 | 1 | 0.080316299 |
| April | 24 | 2 | 0.088964703 |
| April | 24 | 3 | 0.138717046 |
| April | 24 | 4 | 0.138926654 |
| July  | 25 | 1 | 2.250957343 |
| July  | 25 | 2 | 1.024235134 |
| July  | 25 | 3 | 0.975886784 |
| July  | 25 | 4 | 1.018724086 |
| July  | 26 | 1 | 1.078439764 |
| July  | 26 | 2 | 1.03792679  |
| July  | 26 | 3 | 1.074935955 |
| July  | 26 | 4 | 1.006281781 |

|      |    |   |             |
|------|----|---|-------------|
| July | 27 | 1 | 0.479108934 |
| July | 27 | 2 | 0.496119108 |
| July | 27 | 3 | 0.253337481 |
| July | 27 | 4 | 0.527184147 |
| July | 28 | 1 | 0.679198692 |
| July | 28 | 2 | 0.807476548 |
| July | 28 | 3 | 0.798323316 |
| July | 28 | 4 | 0.872539225 |
| July | 29 | 1 | 0.774008755 |
| July | 29 | 2 | 0.775924599 |
| July | 29 | 3 | 0.878558541 |
| July | 29 | 4 | 0.822419521 |
| July | 30 | 1 | 0.629844579 |
| July | 30 | 2 | 0.745957548 |
| July | 30 | 3 | 0.699241569 |
| July | 30 | 4 | 0.71954819  |
| July | 31 | 1 | 1.52050605  |
| July | 31 | 2 | 0.569311163 |
| July | 31 | 3 | 0.562199893 |
| July | 31 | 4 | 0.573747976 |
| July | 32 | 1 | 0.361743664 |
| July | 32 | 2 | 0.383240936 |
| July | 32 | 3 | 0.412284825 |
| July | 32 | 4 | 0.390634875 |
| July | 33 | 1 | 0.938900631 |
| July | 33 | 2 | 1.56828953  |
| July | 33 | 3 | 1.027940962 |
| July | 33 | 4 | 0.858347489 |
| July | 34 | 1 | 0.599671695 |
| July | 34 | 2 | 0.565558566 |
| July | 34 | 3 | 0.543518864 |
| July | 34 | 4 | 0.531503424 |
| July | 35 | 1 | 0.595701838 |
| July | 35 | 2 | 0.586234582 |

|      |    |   |             |
|------|----|---|-------------|
| July | 35 | 3 | 0.58374112  |
| July | 35 | 4 | 0.527842984 |
| July | 36 | 1 | 0.864089818 |
| July | 36 | 2 | 0.808844412 |
| July | 36 | 3 | 0.856974397 |
| July | 36 | 4 | 0.914499352 |
| July | 37 | 1 | 1.46126477  |
| July | 37 | 2 | 0.618735011 |
| July | 37 | 3 | 0.838555113 |
| July | 37 | 4 | 0.827287104 |
| July | 38 | 1 | 0.87579619  |
| July | 38 | 2 | 0.849748502 |
| July | 38 | 3 | 0.887192132 |
| July | 38 | 4 | 0.864593712 |
| July | 39 | 1 | 0.186030891 |
| July | 39 | 2 | 0.051042797 |
| July | 39 | 3 | 0.292015031 |
| July | 39 | 4 | 0.213403252 |
| July | 40 | 1 | 0.53788951  |
| July | 40 | 2 | 0.416696371 |
| July | 40 | 3 | 0.623437755 |
| July | 40 | 4 | 0.688511321 |
| July | 41 | 1 | 5.478321327 |
| July | 41 | 2 | 1.158714071 |
| July | 41 | 3 | 1.184779903 |
| July | 41 | 4 | 1.184015608 |
| July | 42 | 1 | 0.51088379  |
| July | 42 | 2 | 0.532002771 |
| July | 42 | 3 | 0.53089586  |
| July | 42 | 4 | 3.83066347  |
| July | 43 | 1 | 1.207115418 |
| July | 43 | 2 | 0.884991622 |
| July | 43 | 3 | 0.864835843 |
| July | 43 | 4 | 0.897819013 |

|           |    |   |             |
|-----------|----|---|-------------|
| July      | 44 | 1 | 1.001249661 |
| July      | 44 | 2 | 0.962890276 |
| July      | 44 | 3 | 0.993606899 |
| July      | 44 | 4 | 0.946103314 |
| July      | 45 | 1 | 0.78077457  |
| July      | 45 | 2 | 0.7222328   |
| July      | 45 | 3 | 0.741106095 |
| July      | 45 | 4 | 0.691730904 |
| July      | 46 | 1 | 0.78624004  |
| July      | 46 | 2 | 0.808730803 |
| July      | 46 | 3 | 0.765208842 |
| July      | 46 | 4 | 0.778234966 |
| July      | 47 | 1 | 0.756502534 |
| July      | 47 | 2 | 0.782183951 |
| July      | 47 | 3 | 0.799519112 |
| July      | 47 | 4 | 0.787042512 |
| July      | 48 | 1 | 0.866626442 |
| July      | 48 | 2 | 0.952490455 |
| July      | 48 | 3 | 0.835053931 |
| July      | 48 | 4 | 0.870204389 |
| September | 49 | 1 | 0.539651604 |
| September | 49 | 2 | 0.779206505 |
| September | 49 | 3 | 1.007509745 |
| September | 49 | 4 | 0.732552744 |
| September | 50 | 1 | 1.122606618 |
| September | 50 | 2 | 0.991031151 |
| September | 50 | 3 | 1.125291236 |
| September | 50 | 4 | 1.010625577 |
| September | 51 | 1 | 0.937239244 |
| September | 51 | 2 | 0.354225754 |
| September | 51 | 3 | 0.231020225 |
| September | 52 | 1 | 1.3971204   |
| September | 52 | 2 | 1.624571666 |
| September | 52 | 3 | 0.849395523 |

|           |    |   |             |
|-----------|----|---|-------------|
| September | 52 | 4 | 0.586899661 |
| September | 53 | 1 | 1.406506687 |
| September | 53 | 2 | 1.409955858 |
| September | 53 | 3 | 1.37396037  |
| September | 53 | 4 | 1.525239398 |
| September | 54 | 1 | 1.408278397 |
| September | 54 | 2 | 1.593355271 |
| September | 54 | 3 | 1.633182335 |
| September | 54 | 4 | 1.80057132  |
| September | 55 | 1 | 0.229994051 |
| September | 55 | 2 | 0.269937815 |
| September | 55 | 3 | 0.347560545 |
| September | 56 | 1 | 0.355398474 |
| September | 56 | 2 | 0.56870767  |
| September | 56 | 3 | 0.116774007 |
| September | 56 | 4 | 0.163755159 |
| September | 57 | 1 | 0.418373692 |
| September | 57 | 2 | 1.062227964 |
| September | 57 | 3 | 0.385810322 |
| September | 57 | 4 | 0.392436901 |
| September | 58 | 1 | 0.959340263 |
| September | 58 | 2 | 1.023018436 |
| September | 58 | 3 | 0.93310565  |
| September | 58 | 4 | 0.921540711 |
| September | 59 | 1 | 0.973635885 |
| September | 59 | 2 | 0.969591736 |
| September | 59 | 3 | 1.106264534 |
| September | 59 | 4 | 1.046622285 |
| September | 60 | 1 | 1.147282563 |
| September | 60 | 2 | 1.104388469 |
| September | 60 | 3 | 1.113020841 |
| September | 60 | 4 | 1.100770363 |
| September | 61 | 1 | 2.235884636 |
| September | 61 | 2 | 1.527803319 |

|           |    |   |             |
|-----------|----|---|-------------|
| September | 61 | 3 | 2.474480615 |
| September | 61 | 4 | 1.888890718 |
| September | 62 | 1 | 1.211801454 |
| September | 62 | 2 | 1.154717038 |
| September | 62 | 3 | 1.373174606 |
| September | 62 | 4 | 1.034719821 |
| September | 63 | 1 | 1.905736279 |
| September | 63 | 2 | 0.993041977 |
| September | 63 | 3 | 1.101025052 |
| September | 63 | 4 | 1.131274287 |
| September | 64 | 1 | 0.570909492 |
| September | 64 | 2 | 0.559593238 |
| September | 64 | 3 | 0.736208108 |
| September | 64 | 4 | 0.605147487 |
| September | 65 | 1 | 1.450286414 |
| September | 65 | 2 | 1.600522767 |
| September | 65 | 3 | 1.655827417 |
| September | 65 | 4 | 1.177762983 |
| September | 66 | 1 | 1.268249508 |
| September | 66 | 2 | 1.771304027 |
| September | 66 | 3 | 1.74060441  |
| September | 66 | 4 | 1.517465818 |
| September | 67 | 1 | 2.623251372 |
| September | 67 | 2 | 2.760824151 |
| September | 67 | 3 | 2.858667522 |
| September | 67 | 4 | 2.923919851 |
| September | 68 | 1 | 2.620926361 |
| September | 68 | 2 | 2.792783811 |
| September | 68 | 3 | 2.555237562 |
| September | 68 | 4 | 2.687153368 |
| September | 69 | 1 | 1.404471055 |
| September | 69 | 2 | 1.466347325 |
| September | 69 | 3 | 1.497468577 |
| September | 69 | 4 | 1.447689599 |



|           |    |   |             |
|-----------|----|---|-------------|
| September | 70 | 1 | 2.073924877 |
| September | 70 | 2 | 2.42258067  |
| September | 70 | 3 | 2.20912527  |
| September | 70 | 4 | 1.999183648 |
| September | 71 | 1 | 1.904210058 |
| September | 71 | 2 | 2.120968417 |
| September | 71 | 3 | 1.926354172 |
| September | 71 | 4 | 2.010888576 |
| September | 72 | 1 | 1.903533024 |
| September | 72 | 2 | 2.384620288 |
| September | 72 | 3 | 2.026853806 |
| October   | 73 | 1 | 2.893083237 |
| October   | 73 | 2 | 1.382008554 |
| October   | 73 | 3 | 1.25361488  |
| October   | 73 | 4 | 1.444981598 |
| October   | 74 | 1 | 0.54077041  |
| October   | 74 | 2 | 0.765704728 |
| October   | 74 | 3 | 0.824776612 |
| October   | 74 | 4 | 0.836621484 |
| October   | 75 | 1 | 0.89274656  |
| October   | 75 | 2 | 0.981642057 |
| October   | 75 | 3 | 1.052115119 |
| October   | 75 | 4 | 1.053533611 |
| October   | 76 | 1 | 0.506695484 |
| October   | 76 | 2 | 0.68445091  |
| October   | 76 | 3 | 0.749826926 |
| October   | 76 | 4 | 0.778118408 |
| October   | 77 | 1 | 0.801134749 |
| October   | 77 | 2 | 0.854315816 |
| October   | 77 | 3 | 0.873132882 |
| October   | 77 | 4 | 0.789909682 |
| October   | 78 | 1 | 1.031232136 |
| October   | 78 | 2 | 1.067808177 |
| October   | 78 | 3 | 1.12930678  |

|         |    |   |             |
|---------|----|---|-------------|
| October | 78 | 4 | 1.135551894 |
| October | 79 | 1 | 1.11799543  |
| October | 79 | 2 | 1.119626454 |
| October | 79 | 3 | 1.11323639  |
| October | 79 | 4 | 1.097085341 |
| October | 80 | 1 | 1.310523042 |
| October | 80 | 2 | 1.268184468 |
| October | 80 | 3 | 1.293269004 |
| October | 80 | 4 | 1.288591922 |
| October | 81 | 1 | 0.92810195  |
| October | 81 | 2 | 0.978776428 |
| October | 81 | 3 | 0.976136022 |
| October | 81 | 4 | 1.053446569 |
| October | 82 | 1 | 1.161763799 |
| October | 82 | 2 | 1.371248665 |
| October | 82 | 3 | 1.283705154 |
| October | 82 | 4 | 1.857834289 |
| October | 83 | 1 | 0.97150384  |
| October | 83 | 2 | 1.090089435 |
| October | 83 | 3 | 1.286009222 |
| October | 83 | 4 | 1.235247288 |
| October | 84 | 1 | 1.552814427 |
| October | 84 | 2 | 1.479455214 |
| October | 84 | 3 | 0.931872893 |
| October | 84 | 4 | 0.923117981 |
| October | 85 | 1 | 2.906159387 |
| October | 85 | 2 | 1.485181194 |
| October | 85 | 3 | 1.323137754 |
| October | 85 | 4 | 1.431612617 |
| October | 86 | 1 | 1.049159896 |
| October | 86 | 2 | 1.054824908 |
| October | 86 | 3 | 1.114349953 |
| October | 86 | 4 | 1.30398149  |
| October | 87 | 1 | 1.550168907 |

|         |    |   |             |
|---------|----|---|-------------|
| October | 87 | 2 | 1.483231256 |
| October | 87 | 3 | 1.479187307 |
| October | 87 | 4 | 1.525829402 |
| October | 88 | 1 | 0.417253038 |
| October | 88 | 2 | 0.630109816 |
| October | 88 | 3 | 0.580099459 |
| October | 88 | 4 | 0.687147412 |
| October | 89 | 1 | 4.028267708 |
| October | 89 | 2 | 2.612737695 |
| October | 89 | 3 | 3.503666281 |
| October | 89 | 4 | 3.281453704 |
| October | 90 | 1 | 1.570045722 |
| October | 90 | 2 | 1.562771914 |
| October | 90 | 3 | 1.628032813 |
| October | 90 | 4 | 1.701648598 |
| October | 91 | 1 | 2.234640057 |
| October | 91 | 2 | 1.042483752 |
| October | 91 | 3 | 1.026553381 |
| October | 91 | 4 | 1.198201798 |
| October | 92 | 1 | 1.074743509 |
| October | 92 | 2 | 1.287615717 |
| October | 92 | 3 | 1.332320327 |
| October | 92 | 4 | 1.361028246 |
| October | 93 | 1 | 1.475802434 |
| October | 93 | 2 | 1.449795525 |
| October | 93 | 3 | 1.424375131 |
| October | 93 | 4 | 1.386220804 |
| October | 94 | 1 | 1.255124553 |
| October | 94 | 2 | 1.262417563 |
| October | 94 | 3 | 1.38803761  |
| October | 94 | 4 | 1.415373032 |
| October | 95 | 1 | 0.916487    |
| October | 95 | 2 | 0.99362653  |
| October | 95 | 3 | 1.020702475 |

|         |    |   |             |
|---------|----|---|-------------|
| October | 95 | 4 | 1.050836352 |
| October | 96 | 1 | 0.384791499 |
| October | 96 | 2 | 0.779293534 |
| October | 96 | 3 | 0.807596563 |
| October | 96 | 4 | 1.018775275 |

**Data set of carapace widths of *Ucides cordatus***

| Crab | Carapace width (cm) | Treatment    |
|------|---------------------|--------------|
| 1    | 7                   | in air       |
| 2    | 7.1                 | in air       |
| 3    | 6.9                 | in air       |
| 4    | 7.4                 | in air       |
| 5    | 7.3                 | in air       |
| 6    | 7.4                 | in air       |
| 7    | 7.2                 | in air       |
| 8    | 7.6                 | in air       |
| 9    | 7.8                 | in air       |
| 10   | 7.8                 | in air       |
| 11   | 7.7                 | in air       |
| 12   | 7.6                 | in air       |
| 13   | 7.2                 | in air       |
| 14   | 6.5                 | in air       |
| 15   | 7.3                 | in sea water |
| 16   | 7.5                 | in sea water |
| 17   | 6.7                 | in sea water |
| 18   | 7.1                 | in sea water |
| 19   | 6.7                 | in sea water |
| 20   | 6.9                 | in sea water |
| 21   | 6.9                 | in sea water |
| 22   | 6.8                 | in sea water |
| 23   | 7.4                 | in sea water |
| 24   | 7                   | in sea water |
| 25   | 7.3                 | in sea water |
| 26   | 6.2                 | in sea water |
| 27   | 7.4                 | in sea water |
| 28   | 6.5                 | in sea water |

## Data set of crab respiration

| Measurement | Crab | Treatment | Crab respiration ( $\mu\text{mol CO}_2 \text{ kg}^{-1} \text{ s}^{-1}$ ) |
|-------------|------|-----------|--------------------------------------------------------------------------|
| 1           | 1    | in air    | 0.772217306                                                              |
| 2           | 1    | in air    | 0.544718748                                                              |
| 3           | 1    | in air    | 0.846268802                                                              |
| 1           | 2    | in air    | 0.873972546                                                              |
| 2           | 2    | in air    | 0.816937423                                                              |
| 1           | 3    | in air    | 0.872620594                                                              |
| 2           | 3    | in air    | 0.426101252                                                              |
| 3           | 3    | in air    | 1.010319889                                                              |
| 4           | 3    | in air    | 0.674458136                                                              |
| 5           | 3    | in air    | 0.512294575                                                              |
| 1           | 4    | in air    | 3.94324705                                                               |
| 2           | 4    | in air    | 2.062113485                                                              |
| 3           | 4    | in air    | 1.183894614                                                              |
| 4           | 4    | in air    | 1.335128757                                                              |
| 5           | 4    | in air    | 1.439283789                                                              |
| 1           | 5    | in air    | 2.889967275                                                              |
| 2           | 5    | in air    | 1.417610336                                                              |
| 3           | 5    | in air    | 0.915343711                                                              |
| 4           | 5    | in air    | 0.856326727                                                              |
| 5           | 5    | in air    | 0.95281562                                                               |
| 1           | 6    | in air    | 2.034565796                                                              |
| 2           | 6    | in air    | 1.24090179                                                               |
| 3           | 6    | in air    | 0.922850555                                                              |
| 4           | 6    | in air    | 0.615492352                                                              |
| 5           | 6    | in air    | 0.717326825                                                              |
| 1           | 7    | in air    | 1.646410476                                                              |
| 2           | 7    | in air    | 0.925418392                                                              |
| 3           | 7    | in air    | 0.830916778                                                              |
| 4           | 7    | in air    | 0.758456092                                                              |
| 5           | 7    | in air    | 0.630308958                                                              |
| 1           | 8    | in air    | 2.466847467                                                              |
| 2           | 8    | in air    | 1.576370113                                                              |
| 3           | 8    | in air    | 0.987515571                                                              |
| 4           | 8    | in air    | 0.940783296                                                              |
| 5           | 8    | in air    | 0.741828424                                                              |
| 1           | 9    | in air    | 3.501228214                                                              |
| 2           | 9    | in air    | 2.140982215                                                              |
| 3           | 9    | in air    | 1.683005133                                                              |
| 4           | 9    | in air    | 1.179200655                                                              |
| 5           | 9    | in air    | 1.119255607                                                              |
| 1           | 10   | in air    | 1.922006316                                                              |
| 2           | 10   | in air    | 1.390110687                                                              |
| 3           | 10   | in air    | 1.213053993                                                              |
| 4           | 10   | in air    | 0.976777086                                                              |
| 5           | 10   | in air    | 0.705905603                                                              |
| 1           | 11   | in air    | 0.781751673                                                              |
| 2           | 11   | in air    | 0.57391499                                                               |
| 3           | 11   | in air    | 0.375763327                                                              |
| 4           | 11   | in air    | 0.421521187                                                              |

|   |    |              |             |
|---|----|--------------|-------------|
| 5 | 11 | in air       | 0.497671074 |
| 3 | 12 | in air       | 1.272754285 |
| 4 | 12 | in air       | 0.589584019 |
| 5 | 12 | in air       | 0.833750761 |
| 1 | 13 | in air       | 3.765084631 |
| 2 | 13 | in air       | 2.800651846 |
| 3 | 13 | in air       | 1.820897057 |
| 4 | 13 | in air       | 2.036065457 |
| 5 | 13 | in air       | 1.502376128 |
| 1 | 14 | in air       | 4.079028619 |
| 2 | 14 | in air       | 1.713180635 |
| 3 | 14 | in air       | 0.980646903 |
| 4 | 14 | in air       | 0.689960439 |
| 5 | 14 | in air       | 0.826407984 |
| 1 | 15 | in sea water | 1.90458296  |
| 2 | 15 | in sea water | 1.959375624 |
| 3 | 15 | in sea water | 1.654414318 |
| 4 | 15 | in sea water | 1.615881489 |
| 5 | 15 | in sea water | 1.321830338 |
| 1 | 16 | in sea water | 1.731410697 |
| 1 | 17 | in sea water | 1.895090312 |
| 2 | 17 | in sea water | 1.406163159 |
| 3 | 17 | in sea water | 1.253432871 |
| 4 | 17 | in sea water | 0.426064369 |
| 5 | 17 | in sea water | 0.29833501  |
| 1 | 18 | in sea water | 2.391441191 |
| 2 | 18 | in sea water | 1.49366973  |
| 3 | 18 | in sea water | 0.44200516  |
| 4 | 18 | in sea water | 0.485045354 |
| 5 | 18 | in sea water | 0.63813249  |
| 1 | 19 | in sea water | 0.836075526 |
| 2 | 19 | in sea water | 0.115952116 |
| 3 | 19 | in sea water | 0.163512415 |
| 4 | 19 | in sea water | 0.365498125 |
| 5 | 19 | in sea water | 0.898565475 |
| 1 | 20 | in sea water | 1.289199725 |
| 2 | 20 | in sea water | 0.135954079 |
| 3 | 20 | in sea water | 0.865425267 |
| 4 | 20 | in sea water | 0.382119335 |
| 5 | 20 | in sea water | 0.040062837 |
| 1 | 21 | in sea water | 0.383276895 |
| 2 | 21 | in sea water | 0.308988284 |
| 3 | 21 | in sea water | 0.449213623 |
| 4 | 21 | in sea water | 0.489749184 |
| 5 | 21 | in sea water | 0.692793589 |
| 1 | 22 | in sea water | 1.810319458 |
| 2 | 22 | in sea water | 1.493937641 |
| 3 | 22 | in sea water | 1.60622981  |
| 4 | 22 | in sea water | 1.574589014 |
| 5 | 22 | in sea water | 1.944136963 |
| 1 | 23 | in sea water | 2.375689832 |
| 2 | 23 | in sea water | 2.180110224 |

|   |    |              |             |
|---|----|--------------|-------------|
| 3 | 23 | in sea water | 1.804620035 |
| 4 | 23 | in sea water | 1.525574493 |
| 5 | 23 | in sea water | 1.287262821 |
| 1 | 24 | in sea water | 1.217563644 |
| 1 | 25 | in sea water | 1.075643384 |
| 2 | 25 | in sea water | 1.126509184 |
| 3 | 25 | in sea water | 0.62669035  |
| 4 | 25 | in sea water | 0.802019998 |
| 5 | 25 | in sea water | 0.658585977 |
| 1 | 26 | in sea water | 0.779542369 |
| 2 | 26 | in sea water | 0.623571321 |
| 3 | 26 | in sea water | 0.497104746 |
| 4 | 26 | in sea water | 0.466641634 |
| 5 | 26 | in sea water | 0.406007891 |
| 2 | 27 | in sea water | 0.835470905 |
| 3 | 27 | in sea water | 0.652566253 |
| 4 | 27 | in sea water | 0.503141202 |
| 5 | 27 | in sea water | 0.467261895 |
| 1 | 28 | in sea water | 0.604667506 |
| 2 | 28 | in sea water | 0.732538432 |
| 3 | 28 | in sea water | 0.597271497 |
| 4 | 28 | in sea water | 0.340628483 |
| 5 | 28 | in sea water | 0.499979593 |



### Data set of rH values in the burrow wall sediment (BWS)

Some of the burrows or sediment depths could not be measured due to technical difficulties.

| Crab burrow | Time  | Sediment depth (cm) | Horizontal distance (cm) | rH    |
|-------------|-------|---------------------|--------------------------|-------|
| 1           | April | 1                   | 2                        | 26.7  |
| 1           | April | 1                   | 5                        | 16.93 |
| 1           | April | 1                   | 8                        | 19.37 |
| 1           | April | 1                   | 15                       | 17.66 |
| 1           | April | 10                  | 2                        | 15.81 |
| 1           | April | 10                  | 5                        | 15.12 |
| 1           | April | 10                  | 8                        | 15.67 |
| 1           | April | 10                  | 15                       | 17.96 |
| 1           | April | 30                  | 2                        | 14.16 |
| 1           | April | 30                  | 5                        | 13.56 |
| 1           | April | 30                  | 8                        | 9.16  |
| 1           | April | 30                  | 15                       | 11.99 |
| 1           | April | 50                  | 2                        | 9.65  |
| 1           | April | 50                  | 5                        | 9.23  |
| 1           | April | 50                  | 8                        | 8.76  |
| 1           | April | 50                  | 15                       | 9.79  |
| 2           | April | 1                   | 2                        | 10.91 |
| 2           | April | 1                   | 5                        | 10.4  |
| 2           | April | 1                   | 8                        | 10.83 |
| 2           | April | 1                   | 15                       | 14.13 |
| 2           | April | 10                  | 2                        | 9.29  |
| 2           | April | 10                  | 5                        | 8.62  |
| 2           | April | 10                  | 8                        | 8.23  |
| 2           | April | 10                  | 15                       | 7.13  |
| 2           | April | 30                  | 2                        | 7.32  |
| 2           | April | 30                  | 5                        | 7.08  |
| 2           | April | 30                  | 8                        | 6.91  |
| 2           | April | 30                  | 15                       | 7.52  |
| 2           | April | 50                  | 2                        | 7.57  |

|   |       |    |    |       |
|---|-------|----|----|-------|
| 2 | April | 50 | 5  | 6.89  |
| 2 | April | 50 | 8  | 6.64  |
| 2 | April | 50 | 15 | 7.19  |
| 3 | April | 1  | 2  | 11.94 |
| 3 | April | 1  | 5  | 10.73 |
| 3 | April | 1  | 8  | 14.66 |
| 3 | April | 1  | 15 | 13.04 |
| 3 | April | 10 | 2  | 7.59  |
| 3 | April | 10 | 5  | 7.17  |
| 3 | April | 10 | 8  | 6.95  |
| 3 | April | 10 | 15 | 7.71  |
| 3 | April | 30 | 2  | 8.09  |
| 3 | April | 30 | 5  | 7.8   |
| 3 | April | 30 | 8  | 7.58  |
| 3 | April | 30 | 15 | 7.6   |
| 3 | April | 50 | 2  | 7.79  |
| 3 | April | 50 | 5  | 7.57  |
| 3 | April | 50 | 8  | 7.28  |
| 3 | April | 50 | 15 | 7.02  |
| 4 | April | 1  | 2  | 13.38 |
| 4 | April | 1  | 5  | 11.54 |
| 4 | April | 1  | 8  | 10.9  |
| 4 | April | 1  | 15 | 12.67 |
| 4 | April | 10 | 2  | 8.83  |
| 4 | April | 10 | 5  | 7.78  |
| 4 | April | 10 | 8  | 7.17  |
| 4 | April | 10 | 15 | 8.03  |
| 4 | April | 30 | 2  | 8.07  |
| 4 | April | 30 | 5  | 7.74  |
| 4 | April | 30 | 8  | 7.51  |
| 4 | April | 30 | 15 | 8.14  |
| 5 | April | 1  | 2  | 19.16 |
| 5 | April | 1  | 5  | 16.03 |

|   |       |    |    |       |
|---|-------|----|----|-------|
| 5 | April | 1  | 8  | 15.5  |
| 5 | April | 1  | 15 | 17.72 |
| 5 | April | 10 | 2  | 11.61 |
| 5 | April | 10 | 5  | 10.61 |
| 5 | April | 10 | 8  | 10.37 |
| 5 | April | 10 | 15 | 11.1  |
| 5 | April | 30 | 2  | 7.76  |
| 5 | April | 30 | 5  | 7.28  |
| 5 | April | 30 | 8  | 7.25  |
| 5 | April | 30 | 15 | 7.81  |
| 5 | April | 50 | 2  | 8.14  |
| 5 | April | 50 | 5  | 7.9   |
| 5 | April | 50 | 8  | 7.76  |
| 5 | April | 50 | 15 | 7.5   |
| 6 | April | 1  | 2  | 13.74 |
| 6 | April | 1  | 5  | 13.65 |
| 6 | April | 1  | 8  | 18.51 |
| 6 | April | 1  | 15 | 11.74 |
| 6 | April | 10 | 2  | 8.31  |
| 6 | April | 10 | 5  | 8.04  |
| 6 | April | 10 | 8  | 7.79  |
| 6 | April | 10 | 15 | 7.79  |
| 6 | April | 30 | 2  | 7.78  |
| 6 | April | 30 | 5  | 7.54  |
| 6 | April | 30 | 8  | 7.4   |
| 6 | April | 30 | 15 | 7.61  |
| 6 | April | 50 | 2  | 8.73  |
| 6 | April | 50 | 5  | 8.05  |
| 6 | April | 50 | 8  | 7.83  |
| 6 | April | 50 | 15 | 7.77  |
| 7 | April | 1  | 2  | 17.93 |
| 7 | April | 1  | 5  | 17.98 |
| 7 | April | 1  | 8  | 19.95 |

|   |       |    |    |       |
|---|-------|----|----|-------|
| 7 | April | 1  | 15 | 21.24 |
| 8 | April | 1  | 2  | 9.7   |
| 8 | April | 1  | 5  | 10.1  |
| 8 | April | 1  | 8  | 16.7  |
| 8 | April | 1  | 15 | 15.32 |
| 8 | April | 10 | 2  | 16.66 |
| 8 | April | 10 | 5  | 15.96 |
| 8 | April | 10 | 8  | 15.24 |
| 8 | April | 10 | 15 | 16.17 |
| 8 | April | 30 | 2  | 8.87  |
| 8 | April | 30 | 5  | 8.08  |
| 8 | April | 30 | 8  | 9.94  |
| 8 | April | 30 | 15 | 8.82  |
| 8 | April | 50 | 2  | 9.51  |
| 8 | April | 50 | 5  | 8.85  |
| 8 | April | 50 | 8  | 7.64  |
| 8 | April | 50 | 15 | 7.91  |
| 9 | April | 1  | 2  | 15.98 |
| 9 | April | 1  | 5  | 19.08 |
| 9 | April | 1  | 8  | 16.36 |
| 9 | April | 1  | 15 | 14.28 |
| 9 | April | 10 | 2  | 16.68 |
| 9 | April | 10 | 5  | 16.23 |
| 9 | April | 10 | 8  | 15.06 |
| 9 | April | 10 | 15 | 12.02 |
| 9 | April | 30 | 2  | 13.32 |
| 9 | April | 30 | 5  | 12.18 |
| 9 | April | 30 | 8  | 13.74 |
| 9 | April | 30 | 15 | 12.03 |
| 9 | April | 50 | 2  | 9.52  |
| 9 | April | 50 | 5  | 8.94  |
| 9 | April | 50 | 8  | 8.59  |
| 9 | April | 50 | 15 | 9.11  |

|    |       |    |    |       |
|----|-------|----|----|-------|
| 13 | April | 1  | 2  | 10.65 |
| 13 | April | 1  | 5  | 11.29 |
| 13 | April | 1  | 8  | 10.73 |
| 13 | April | 1  | 15 | 11.31 |
| 13 | April | 10 | 2  | 15    |
| 13 | April | 10 | 5  | 13.27 |
| 13 | April | 10 | 8  | 12.66 |
| 13 | April | 10 | 15 | 12.16 |
| 13 | April | 30 | 2  | 13.12 |
| 13 | April | 30 | 5  | 10.66 |
| 13 | April | 30 | 8  | 10.22 |
| 13 | April | 30 | 15 | 9.49  |
| 14 | April | 1  | 2  | 14.09 |
| 14 | April | 1  | 5  | 15.11 |
| 14 | April | 1  | 8  | 14.07 |
| 14 | April | 1  | 15 | 15.95 |
| 14 | April | 10 | 2  | 12.2  |
| 14 | April | 10 | 5  | 12.07 |
| 14 | April | 10 | 8  | 11.66 |
| 14 | April | 10 | 15 | 13.13 |
| 14 | April | 30 | 2  | 15.29 |
| 14 | April | 30 | 5  | 15.24 |
| 14 | April | 30 | 8  | 14.93 |
| 14 | April | 30 | 15 | 14.03 |
| 15 | April | 1  | 2  | 15.14 |
| 15 | April | 1  | 5  | 14.62 |
| 15 | April | 1  | 8  | 13.18 |
| 15 | April | 1  | 15 | 18.29 |
| 15 | April | 10 | 2  | 15.44 |
| 15 | April | 10 | 5  | 15.38 |
| 15 | April | 10 | 8  | 15.05 |
| 15 | April | 10 | 15 | 11.97 |
| 15 | April | 30 | 2  | 13    |

|    |       |    |    |       |
|----|-------|----|----|-------|
| 15 | April | 30 | 5  | 11.68 |
| 15 | April | 30 | 8  | 11.42 |
| 15 | April | 30 | 15 | 9.69  |
| 16 | April | 1  | 2  | 18.27 |
| 16 | April | 1  | 5  | 18.49 |
| 16 | April | 1  | 8  | 18.15 |
| 16 | April | 1  | 15 | 18.52 |
| 16 | April | 10 | 2  | 14.36 |
| 16 | April | 10 | 5  | 14.37 |
| 16 | April | 10 | 8  | 14.1  |
| 16 | April | 10 | 15 | 12.6  |
| 16 | April | 30 | 2  | 11.23 |
| 16 | April | 30 | 5  | 11.47 |
| 16 | April | 30 | 8  | 11.17 |
| 16 | April | 30 | 15 | 11.54 |
| 16 | April | 50 | 2  | 11.55 |
| 16 | April | 50 | 5  | 11.36 |
| 16 | April | 50 | 8  | 9.74  |
| 16 | April | 50 | 15 | 9.76  |
| 17 | April | 1  | 2  | 13.99 |
| 17 | April | 1  | 5  | 12.93 |
| 17 | April | 1  | 8  | 13.73 |
| 17 | April | 1  | 15 | 14.54 |
| 17 | April | 10 | 2  | 15.44 |
| 17 | April | 10 | 5  | 15.42 |
| 17 | April | 10 | 8  | 14.57 |
| 17 | April | 10 | 15 | 13.56 |
| 17 | April | 30 | 2  | 12.71 |
| 17 | April | 30 | 5  | 13.18 |
| 17 | April | 30 | 8  | 12.88 |
| 17 | April | 30 | 15 | 12.36 |
| 17 | April | 50 | 2  | 13.39 |
| 17 | April | 50 | 5  | 12.97 |

|    |       |    |    |       |
|----|-------|----|----|-------|
| 17 | April | 50 | 8  | 12.65 |
| 17 | April | 50 | 15 | 12.73 |
| 18 | April | 1  | 2  | 13.11 |
| 18 | April | 1  | 5  | 12.29 |
| 18 | April | 1  | 8  | 13.81 |
| 18 | April | 1  | 15 | 14.53 |
| 18 | April | 10 | 2  | 14.4  |
| 18 | April | 10 | 5  | 13.04 |
| 18 | April | 10 | 8  | 13.54 |
| 18 | April | 10 | 15 | 15.76 |
| 19 | April | 1  | 2  | 11.49 |
| 19 | April | 1  | 5  | 11.84 |
| 19 | April | 1  | 8  | 12.45 |
| 19 | April | 1  | 15 | 13.14 |
| 19 | April | 10 | 2  | 12.38 |
| 19 | April | 10 | 5  | 11.04 |
| 19 | April | 10 | 8  | 11.15 |
| 19 | April | 10 | 15 | 16.08 |
| 19 | April | 30 | 2  | 8.67  |
| 19 | April | 30 | 5  | 8.52  |
| 19 | April | 30 | 8  | 8.37  |
| 19 | April | 30 | 15 | 7.92  |
| 20 | April | 1  | 2  | 14.59 |
| 20 | April | 1  | 5  | 14.14 |
| 20 | April | 1  | 8  | 14.13 |
| 20 | April | 1  | 15 | 15.5  |
| 20 | April | 10 | 2  | 10.94 |
| 20 | April | 10 | 5  | 11.03 |
| 20 | April | 10 | 8  | 10.63 |
| 20 | April | 10 | 15 | 12.03 |
| 20 | April | 30 | 2  | 8.45  |
| 20 | April | 30 | 5  | 8     |
| 20 | April | 30 | 8  | 8.13  |

|    |       |    |    |       |
|----|-------|----|----|-------|
| 20 | April | 30 | 15 | 9.12  |
| 21 | April | 1  | 2  | 15.25 |
| 21 | April | 1  | 5  | 15.5  |
| 21 | April | 1  | 8  | 14.97 |
| 21 | April | 1  | 15 | 13.64 |
| 21 | April | 10 | 2  | 16.81 |
| 21 | April | 10 | 5  | 16.15 |
| 21 | April | 10 | 8  | 15.04 |
| 21 | April | 10 | 15 | 15.06 |
| 21 | April | 30 | 2  | 12.99 |
| 21 | April | 30 | 5  | 12.18 |
| 21 | April | 30 | 8  | 11.67 |
| 21 | April | 30 | 15 | 13.57 |
| 21 | April | 50 | 2  | 10.35 |
| 21 | April | 50 | 5  | 10.37 |
| 21 | April | 50 | 8  | 9.62  |
| 21 | April | 50 | 15 | 10.25 |
| 22 | April | 1  | 2  | 16.07 |
| 22 | April | 1  | 5  | 15.36 |
| 22 | April | 1  | 8  | 13.01 |
| 22 | April | 1  | 15 | 12.56 |
| 22 | April | 10 | 2  | 13.62 |
| 22 | April | 10 | 5  | 12.75 |
| 22 | April | 10 | 8  | 11.94 |
| 22 | April | 10 | 15 | 14.07 |
| 22 | April | 30 | 2  | 13.62 |
| 22 | April | 30 | 5  | 12.88 |
| 22 | April | 30 | 8  | 12.42 |
| 22 | April | 30 | 15 | 12.61 |
| 22 | April | 50 | 2  | 10.84 |
| 22 | April | 50 | 5  | 10.18 |
| 22 | April | 50 | 8  | 9.74  |
| 22 | April | 50 | 15 | 9.86  |



|    |      |    |    |       |
|----|------|----|----|-------|
| 31 | July | 1  | 2  | 16.86 |
| 31 | July | 1  | 5  | 15.33 |
| 31 | July | 1  | 8  | 15.8  |
| 31 | July | 1  | 15 | 15.67 |
| 31 | July | 10 | 2  | 20.39 |
| 31 | July | 10 | 5  | 18.04 |
| 31 | July | 10 | 8  | 16.82 |
| 31 | July | 10 | 15 | 20.49 |
| 31 | July | 30 | 2  | 17.08 |
| 31 | July | 30 | 5  | 13.87 |
| 31 | July | 30 | 8  | 13.65 |
| 31 | July | 30 | 15 | 13.01 |
| 32 | July | 1  | 2  | 16.76 |
| 32 | July | 1  | 5  | 15.97 |
| 32 | July | 1  | 8  | 16.17 |
| 32 | July | 1  | 15 | 14.83 |
| 32 | July | 10 | 2  | 12.23 |
| 32 | July | 10 | 5  | 11.78 |
| 32 | July | 10 | 8  | 12.06 |
| 32 | July | 10 | 15 | 11.53 |
| 33 | July | 1  | 2  | 14.01 |
| 33 | July | 1  | 5  | 12.88 |
| 33 | July | 1  | 8  | 16.09 |
| 33 | July | 1  | 15 | 15.96 |
| 33 | July | 10 | 2  | 12.06 |
| 33 | July | 10 | 5  | 12.24 |
| 33 | July | 10 | 8  | 12.34 |
| 33 | July | 10 | 15 | 13.79 |
| 33 | July | 30 | 2  | 10.87 |
| 33 | July | 30 | 5  | 11.11 |
| 33 | July | 30 | 8  | 10.48 |
| 33 | July | 30 | 15 | 11.37 |
| 34 | July | 1  | 2  | 14.25 |

|    |      |    |    |       |
|----|------|----|----|-------|
| 34 | July | 1  | 5  | 14.21 |
| 34 | July | 1  | 8  | 12.13 |
| 34 | July | 1  | 15 | 12.27 |
| 34 | July | 10 | 2  | 9.41  |
| 34 | July | 10 | 5  | 9.33  |
| 34 | July | 10 | 8  | 8.72  |
| 34 | July | 10 | 15 | 14.51 |
| 34 | July | 30 | 2  | 11.54 |
| 34 | July | 30 | 5  | 11.39 |
| 34 | July | 30 | 8  | 11.33 |
| 34 | July | 30 | 15 | 11.39 |
| 35 | July | 1  | 2  | 14.07 |
| 35 | July | 1  | 5  | 15.17 |
| 35 | July | 1  | 8  | 14.95 |
| 35 | July | 1  | 15 | 16.21 |
| 35 | July | 10 | 2  | 15.85 |
| 35 | July | 10 | 5  | 15.71 |
| 35 | July | 10 | 8  | 14.05 |
| 35 | July | 10 | 15 | 15.17 |
| 35 | July | 30 | 2  | 16.33 |
| 35 | July | 30 | 5  | 15.67 |
| 35 | July | 30 | 8  | 15.28 |
| 35 | July | 30 | 15 | 15.24 |
| 36 | July | 1  | 2  | 14.6  |
| 36 | July | 1  | 5  | 13.86 |
| 36 | July | 1  | 8  | 16.49 |
| 36 | July | 1  | 15 | 16.89 |
| 36 | July | 10 | 2  | 12.7  |
| 36 | July | 10 | 5  | 10.83 |
| 36 | July | 10 | 8  | 11.4  |
| 36 | July | 10 | 15 | 14.28 |
| 36 | July | 30 | 2  | 11.19 |
| 36 | July | 30 | 5  | 11.23 |

|    |      |    |    |       |
|----|------|----|----|-------|
| 36 | July | 30 | 8  | 11.62 |
| 36 | July | 30 | 15 | 12.39 |
| 37 | July | 1  | 2  | 17.13 |
| 37 | July | 1  | 5  | 19.05 |
| 37 | July | 1  | 8  | 14.16 |
| 37 | July | 1  | 15 | 13.89 |
| 37 | July | 10 | 2  | 14.79 |
| 37 | July | 10 | 5  | 14.72 |
| 37 | July | 10 | 8  | 14.71 |
| 37 | July | 10 | 15 | 13.67 |
| 37 | July | 30 | 2  | 15.36 |
| 37 | July | 30 | 5  | 15.5  |
| 37 | July | 30 | 8  | 15.22 |
| 38 | July | 1  | 2  | 17.57 |
| 38 | July | 1  | 5  | 16.91 |
| 38 | July | 1  | 8  | 16.22 |
| 38 | July | 1  | 15 | 17.22 |
| 38 | July | 10 | 2  | 16.81 |
| 38 | July | 10 | 5  | 16.53 |
| 38 | July | 10 | 8  | 16.42 |
| 38 | July | 10 | 15 | 15.82 |
| 38 | July | 30 | 2  | 15.77 |
| 38 | July | 30 | 5  | 15.1  |
| 38 | July | 30 | 8  | 14.55 |
| 38 | July | 30 | 15 | 12.53 |
| 39 | July | 1  | 2  | 26.03 |
| 39 | July | 1  | 5  | 26.42 |
| 39 | July | 1  | 8  | 24.56 |
| 39 | July | 1  | 15 | 20.29 |
| 39 | July | 10 | 2  | 14.53 |
| 39 | July | 10 | 5  | 14.13 |
| 39 | July | 10 | 8  | 13.84 |
| 39 | July | 10 | 15 | 15.79 |

|    |      |    |    |       |
|----|------|----|----|-------|
| 39 | July | 30 | 2  | 12.1  |
| 39 | July | 30 | 5  | 10.79 |
| 39 | July | 30 | 8  | 10.82 |
| 39 | July | 30 | 15 | 8.92  |
| 40 | July | 1  | 2  | 18.31 |
| 40 | July | 1  | 5  | 17.21 |
| 40 | July | 1  | 8  | 16.14 |
| 40 | July | 1  | 15 | 20.44 |
| 40 | July | 10 | 2  | 16.08 |
| 40 | July | 10 | 5  | 15.58 |
| 40 | July | 10 | 8  | 15.11 |
| 40 | July | 10 | 15 | 17.44 |
| 40 | July | 30 | 2  | 13.3  |
| 40 | July | 30 | 5  | 12.59 |
| 40 | July | 30 | 8  | 11.71 |
| 40 | July | 30 | 15 | 12.22 |
| 41 | July | 1  | 2  | 16.39 |
| 41 | July | 1  | 5  | 15.69 |
| 41 | July | 1  | 8  | 15.61 |
| 41 | July | 1  | 15 | 15.93 |
| 41 | July | 10 | 2  | 15.22 |
| 41 | July | 10 | 5  | 15.09 |
| 41 | July | 10 | 8  | 14.64 |
| 41 | July | 10 | 15 | 13.57 |
| 41 | July | 30 | 2  | 10.82 |
| 41 | July | 30 | 5  | 10.29 |
| 41 | July | 30 | 8  | 10.41 |
| 41 | July | 30 | 15 | 10.47 |
| 41 | July | 50 | 2  | 12.12 |
| 41 | July | 50 | 5  | 13.09 |
| 41 | July | 50 | 8  | 12.82 |
| 41 | July | 50 | 15 | 9.02  |
| 42 | July | 1  | 2  | 16.66 |

|    |      |    |    |       |
|----|------|----|----|-------|
| 42 | July | 1  | 5  | 14.66 |
| 42 | July | 1  | 8  | 17.04 |
| 42 | July | 1  | 15 | 17.48 |
| 42 | July | 10 | 2  | 14.43 |
| 42 | July | 10 | 5  | 14.43 |
| 42 | July | 10 | 8  | 13.95 |
| 42 | July | 10 | 15 | 14.28 |
| 42 | July | 30 | 2  | 11.25 |
| 42 | July | 30 | 5  | 10.07 |
| 42 | July | 30 | 8  | 9.28  |
| 42 | July | 30 | 15 | 8.09  |
| 42 | July | 50 | 2  | 9.63  |
| 42 | July | 50 | 5  | 9.61  |
| 42 | July | 50 | 8  | 9.24  |
| 42 | July | 50 | 15 | 9.37  |
| 43 | July | 1  | 2  | 16.32 |
| 43 | July | 1  | 5  | 17.91 |
| 43 | July | 1  | 8  | 17.27 |
| 43 | July | 1  | 15 | 12.22 |
| 44 | July | 1  | 2  | 19.43 |
| 44 | July | 1  | 5  | 18.75 |
| 44 | July | 1  | 8  | 18.94 |
| 44 | July | 1  | 15 | 21.83 |
| 44 | July | 10 | 2  | 18.44 |
| 44 | July | 10 | 5  | 17.74 |
| 44 | July | 10 | 8  | 17.83 |
| 44 | July | 10 | 15 | 18.29 |
| 44 | July | 30 | 2  | 14.07 |
| 44 | July | 30 | 5  | 14.15 |
| 44 | July | 30 | 8  | 14.02 |
| 44 | July | 30 | 15 | 13.77 |
| 44 | July | 50 | 2  | 12.56 |
| 44 | July | 50 | 5  | 13.13 |

|    |      |    |    |       |
|----|------|----|----|-------|
| 44 | July | 50 | 8  | 12.98 |
| 44 | July | 50 | 15 | 11.63 |
| 45 | July | 1  | 2  | 14.7  |
| 45 | July | 1  | 5  | 16.69 |
| 45 | July | 1  | 8  | 16.56 |
| 45 | July | 1  | 15 | 18.16 |
| 45 | July | 10 | 2  | 12.67 |
| 45 | July | 10 | 5  | 12.78 |
| 45 | July | 10 | 8  | 12.62 |
| 45 | July | 10 | 15 | 14.09 |
| 45 | July | 30 | 2  | 8.3   |
| 45 | July | 30 | 5  | 8.94  |
| 45 | July | 30 | 8  | 7.65  |
| 45 | July | 30 | 15 | 8.87  |
| 45 | July | 50 | 2  | 9.61  |
| 45 | July | 50 | 5  | 9.01  |
| 45 | July | 50 | 8  | 8.55  |
| 45 | July | 50 | 15 | 10.05 |
| 46 | July | 1  | 2  | 16.18 |
| 46 | July | 1  | 5  | 17.31 |
| 46 | July | 1  | 8  | 16.8  |
| 46 | July | 1  | 15 | 15.76 |
| 46 | July | 10 | 2  | 16.87 |
| 46 | July | 10 | 5  | 16.87 |
| 46 | July | 10 | 8  | 16.07 |
| 46 | July | 10 | 15 | 15.91 |
| 46 | July | 30 | 2  | 16.2  |
| 46 | July | 30 | 5  | 16.02 |
| 46 | July | 30 | 8  | 13.42 |
| 46 | July | 30 | 15 | 10.8  |
| 46 | July | 50 | 2  | 14.57 |
| 46 | July | 50 | 5  | 15.08 |
| 46 | July | 50 | 8  | 14.64 |

|    |      |    |    |       |
|----|------|----|----|-------|
| 46 | July | 50 | 15 | 13.29 |
| 47 | July | 1  | 2  | 16.05 |
| 47 | July | 1  | 5  | 14.09 |
| 47 | July | 1  | 8  | 18.05 |
| 47 | July | 1  | 15 | 18.78 |
| 47 | July | 10 | 2  | 16.68 |
| 47 | July | 10 | 5  | 16.33 |
| 47 | July | 10 | 8  | 16.68 |
| 47 | July | 10 | 15 | 17.38 |
| 47 | July | 30 | 2  | 13.86 |
| 47 | July | 30 | 5  | 13.23 |
| 47 | July | 30 | 8  | 12.61 |
| 47 | July | 30 | 15 | 10.71 |
| 47 | July | 50 | 2  | 14.55 |
| 47 | July | 50 | 5  | 14.03 |
| 47 | July | 50 | 8  | 13.09 |
| 47 | July | 50 | 15 | 11.83 |
| 48 | July | 1  | 2  | 12.38 |
| 48 | July | 1  | 5  | 13.56 |
| 48 | July | 1  | 8  | 12.44 |
| 48 | July | 1  | 15 | 12.52 |
| 48 | July | 10 | 2  | 15.42 |
| 48 | July | 10 | 5  | 15.07 |
| 48 | July | 10 | 8  | 14.92 |
| 48 | July | 10 | 15 | 12.51 |
| 49 | July | 1  | 2  | 14.74 |
| 49 | July | 1  | 5  | 14.91 |
| 49 | July | 1  | 8  | 18.56 |
| 49 | July | 1  | 15 | 20.09 |
| 49 | July | 10 | 2  | 15.4  |
| 49 | July | 10 | 5  | 14.6  |
| 49 | July | 10 | 8  | 13.33 |
| 49 | July | 10 | 15 | 12.38 |

|    |      |    |    |       |
|----|------|----|----|-------|
| 49 | July | 30 | 2  | 14.22 |
| 49 | July | 30 | 5  | 11.97 |
| 49 | July | 30 | 8  | 12.23 |
| 49 | July | 30 | 15 | 9.91  |
| 49 | July | 50 | 2  | 9.5   |
| 49 | July | 50 | 5  | 7.86  |
| 49 | July | 50 | 8  | 8.34  |
| 49 | July | 50 | 15 | 10.19 |
| 50 | July | 1  | 2  | 14.72 |
| 50 | July | 1  | 5  | 14.2  |
| 50 | July | 1  | 8  | 18.56 |
| 50 | July | 1  | 15 | 21.87 |
| 50 | July | 10 | 2  | 17.16 |
| 50 | July | 10 | 5  | 16.92 |
| 50 | July | 10 | 8  | 12.93 |
| 50 | July | 10 | 15 | 13.06 |
| 50 | July | 30 | 2  | 14.02 |
| 50 | July | 30 | 5  | 13.02 |
| 50 | July | 30 | 8  | 13.56 |
| 50 | July | 30 | 15 | 13.32 |
| 50 | July | 50 | 2  | 10.03 |
| 50 | July | 50 | 5  | 10.11 |
| 50 | July | 50 | 8  | 9.84  |
| 50 | July | 50 | 15 | 9.87  |
| 51 | July | 1  | 2  | 12.37 |
| 51 | July | 1  | 5  | 12.55 |
| 51 | July | 1  | 8  | 13.65 |
| 51 | July | 1  | 15 | 14.94 |
| 51 | July | 10 | 2  | 14.08 |
| 51 | July | 10 | 5  | 14.11 |
| 51 | July | 10 | 8  | 13.84 |
| 51 | July | 10 | 15 | 14.91 |
| 51 | July | 30 | 2  | 11.65 |



|    |      |    |    |       |
|----|------|----|----|-------|
| 51 | July | 30 | 5  | 11.49 |
| 51 | July | 30 | 8  | 11.1  |
| 51 | July | 30 | 15 | 10.59 |
| 51 | July | 50 | 2  | 9.28  |
| 51 | July | 50 | 5  | 8.86  |
| 51 | July | 50 | 8  | 9.4   |
| 51 | July | 50 | 15 | 10.92 |
| 52 | July | 1  | 2  | 14.09 |
| 52 | July | 1  | 5  | 14.89 |
| 52 | July | 1  | 8  | 16.6  |
| 52 | July | 1  | 15 | 17.17 |
| 52 | July | 10 | 2  | 14.1  |
| 52 | July | 10 | 5  | 12.78 |
| 52 | July | 10 | 8  | 12.31 |
| 52 | July | 10 | 15 | 12.48 |
| 52 | July | 30 | 2  | 14.34 |
| 52 | July | 30 | 5  | 14.29 |
| 52 | July | 30 | 8  | 13.46 |
| 52 | July | 30 | 15 | 11.47 |
| 52 | July | 50 | 2  | 10.09 |
| 52 | July | 50 | 5  | 9.6   |
| 52 | July | 50 | 8  | 9.39  |
| 52 | July | 50 | 15 | 10.61 |
| 53 | July | 1  | 2  | 14.7  |
| 53 | July | 1  | 5  | 14.91 |
| 53 | July | 1  | 8  | 14.84 |
| 53 | July | 1  | 15 | 16.23 |
| 53 | July | 10 | 2  | 14.47 |
| 53 | July | 10 | 5  | 13.33 |
| 53 | July | 10 | 8  | 12.95 |
| 53 | July | 10 | 15 | 13.03 |
| 53 | July | 30 | 2  | 13.33 |
| 53 | July | 30 | 5  | 13.58 |

|    |           |    |    |       |
|----|-----------|----|----|-------|
| 53 | July      | 30 | 8  | 10.66 |
| 53 | July      | 30 | 15 | 12.09 |
| 54 | July      | 1  | 2  | 16.94 |
| 54 | July      | 1  | 5  | 19.62 |
| 54 | July      | 1  | 8  | 16.49 |
| 54 | July      | 1  | 15 | 15.9  |
| 54 | July      | 10 | 2  | 15.42 |
| 54 | July      | 10 | 5  | 15.55 |
| 54 | July      | 10 | 8  | 15.42 |
| 54 | July      | 10 | 15 | 14.44 |
| 54 | July      | 30 | 2  | 16.74 |
| 54 | July      | 30 | 5  | 15.74 |
| 54 | July      | 30 | 8  | 15.59 |
| 54 | July      | 30 | 15 | 11.23 |
| 54 | July      | 50 | 2  | 10.54 |
| 54 | July      | 50 | 5  | 10.18 |
| 54 | July      | 50 | 8  | 9.97  |
| 54 | July      | 50 | 15 | 10.09 |
| 55 | September | 1  | 2  | 20.37 |
| 55 | September | 1  | 5  | 18.57 |
| 55 | September | 1  | 8  | 19.92 |
| 55 | September | 1  | 15 | 18.3  |
| 55 | September | 10 | 2  | 19.18 |
| 55 | September | 10 | 5  | 20.51 |
| 55 | September | 10 | 8  | 18.9  |
| 55 | September | 10 | 15 | 18    |
| 55 | September | 30 | 2  | 18.21 |
| 55 | September | 30 | 5  | 15.8  |
| 55 | September | 30 | 8  | 15.11 |
| 55 | September | 30 | 15 | 16.11 |
| 56 | September | 1  | 2  | 17.01 |
| 56 | September | 1  | 5  | 16.49 |
| 56 | September | 1  | 8  | 17.3  |

|    |           |    |    |       |
|----|-----------|----|----|-------|
| 56 | September | 1  | 15 | 18.29 |
| 56 | September | 10 | 2  | 18.19 |
| 56 | September | 10 | 5  | 17.29 |
| 56 | September | 10 | 8  | 18.09 |
| 56 | September | 10 | 15 | 17.93 |
| 56 | September | 30 | 2  | 16.32 |
| 56 | September | 30 | 5  | 15    |
| 56 | September | 30 | 8  | 13.25 |
| 56 | September | 30 | 15 | 13.73 |
| 57 | September | 1  | 2  | 22.54 |
| 57 | September | 1  | 5  | 21.18 |
| 57 | September | 1  | 8  | 24.29 |
| 57 | September | 1  | 15 | 22.43 |
| 57 | September | 10 | 2  | 17.59 |
| 57 | September | 10 | 5  | 16.75 |
| 57 | September | 10 | 8  | 16.68 |
| 57 | September | 10 | 15 | 15.76 |
| 57 | September | 30 | 2  | 10.18 |
| 57 | September | 30 | 5  | 9.16  |
| 57 | September | 30 | 8  | 9.38  |
| 57 | September | 30 | 15 | 8.7   |
| 58 | September | 1  | 2  | 15.34 |
| 58 | September | 1  | 5  | 12.52 |
| 58 | September | 1  | 8  | 10.24 |
| 58 | September | 1  | 15 | 14.21 |
| 58 | September | 10 | 2  | 17.94 |
| 58 | September | 10 | 5  | 18.42 |
| 58 | September | 10 | 8  | 14.76 |
| 58 | September | 10 | 15 | 11.59 |
| 58 | September | 30 | 2  | 10.64 |
| 58 | September | 30 | 5  | 12.08 |
| 58 | September | 30 | 8  | 11.82 |
| 58 | September | 30 | 15 | 10.74 |

|    |           |    |    |       |
|----|-----------|----|----|-------|
| 59 | September | 1  | 2  | 20.44 |
| 59 | September | 1  | 5  | 20.87 |
| 59 | September | 1  | 8  | 20.59 |
| 59 | September | 1  | 15 | 18.88 |
| 59 | September | 10 | 2  | 15.52 |
| 59 | September | 10 | 5  | 15.81 |
| 59 | September | 10 | 8  | 15.51 |
| 59 | September | 10 | 15 | 14.1  |
| 59 | September | 30 | 2  | 14.56 |
| 59 | September | 30 | 5  | 14.71 |
| 59 | September | 30 | 8  | 14.8  |
| 59 | September | 30 | 15 | 13.5  |
| 60 | September | 1  | 2  | 14.02 |
| 60 | September | 1  | 5  | 14.04 |
| 60 | September | 1  | 8  | 13.38 |
| 60 | September | 1  | 15 | 13.49 |
| 60 | September | 10 | 2  | 12.92 |
| 60 | September | 10 | 5  | 12.34 |
| 60 | September | 10 | 8  | 11.83 |
| 60 | September | 10 | 15 | 13.14 |
| 60 | September | 30 | 2  | 15.08 |
| 60 | September | 30 | 5  | 15.05 |
| 60 | September | 30 | 8  | 13.83 |
| 60 | September | 30 | 15 | 10.14 |
| 61 | September | 1  | 2  | 16.36 |
| 61 | September | 1  | 5  | 16.49 |
| 61 | September | 1  | 8  | 15.92 |
| 61 | September | 1  | 15 | 16.36 |
| 61 | September | 10 | 2  | 21.54 |
| 61 | September | 10 | 5  | 21.49 |
| 61 | September | 10 | 8  | 18.65 |
| 61 | September | 10 | 15 | 23.67 |
| 61 | September | 30 | 2  | 20.56 |

|    |           |    |    |       |
|----|-----------|----|----|-------|
| 61 | September | 30 | 5  | 17.34 |
| 61 | September | 30 | 8  | 18.24 |
| 61 | September | 30 | 15 | 19.07 |
| 62 | September | 1  | 2  | 14.55 |
| 62 | September | 1  | 5  | 15.4  |
| 62 | September | 1  | 8  | 15.15 |
| 62 | September | 1  | 15 | 15.24 |
| 62 | September | 10 | 2  | 17.61 |
| 62 | September | 10 | 5  | 16.35 |
| 62 | September | 10 | 8  | 15.52 |
| 62 | September | 10 | 15 | 15.52 |
| 62 | September | 30 | 2  | 13.57 |
| 62 | September | 30 | 5  | 12.9  |
| 62 | September | 30 | 8  | 12.56 |
| 62 | September | 30 | 15 | 12.74 |
| 62 | September | 50 | 2  | 9.99  |
| 62 | September | 50 | 5  | 10.76 |
| 62 | September | 50 | 8  | 10.58 |
| 62 | September | 50 | 15 | 10.39 |
| 63 | September | 1  | 2  | 16.04 |
| 63 | September | 1  | 5  | 18.14 |
| 63 | September | 1  | 8  | 17.02 |
| 63 | September | 1  | 15 | 18.63 |
| 63 | September | 10 | 2  | 18.49 |
| 63 | September | 10 | 5  | 15.29 |
| 63 | September | 10 | 8  | 13.04 |
| 63 | September | 10 | 15 | 13.25 |
| 63 | September | 30 | 2  | 17.81 |
| 63 | September | 30 | 5  | 15.45 |
| 63 | September | 30 | 8  | 14.62 |
| 63 | September | 50 | 2  | 13.84 |
| 63 | September | 50 | 5  | 12.46 |
| 63 | September | 50 | 8  | 11.91 |

|    |           |    |    |       |
|----|-----------|----|----|-------|
| 63 | September | 50 | 15 | 11.43 |
| 64 | September | 1  | 2  | 13.25 |
| 64 | September | 1  | 5  | 16.51 |
| 64 | September | 1  | 8  | 17.75 |
| 64 | September | 1  | 15 | 16.24 |
| 64 | September | 10 | 2  | 14.44 |
| 64 | September | 10 | 5  | 13.86 |
| 64 | September | 10 | 8  | 13.41 |
| 64 | September | 10 | 15 | 14.27 |
| 64 | September | 30 | 2  | 12.96 |
| 64 | September | 30 | 5  | 12.8  |
| 64 | September | 30 | 8  | 12.21 |
| 64 | September | 30 | 15 | 7.24  |
| 64 | September | 50 | 2  | 13.34 |
| 64 | September | 50 | 5  | 13.24 |
| 64 | September | 50 | 8  | 11.24 |
| 64 | September | 50 | 15 | 11.33 |
| 65 | September | 1  | 2  | 19.94 |
| 65 | September | 1  | 5  | 17.05 |
| 65 | September | 1  | 8  | 17.8  |
| 65 | September | 1  | 15 | 16.58 |
| 65 | September | 10 | 2  | 17.51 |
| 65 | September | 10 | 5  | 16.91 |
| 65 | September | 10 | 8  | 16.42 |
| 65 | September | 10 | 15 | 16.59 |
| 65 | September | 30 | 2  | 14.89 |
| 65 | September | 30 | 5  | 14.62 |
| 65 | September | 30 | 15 | 13.86 |
| 65 | September | 50 | 2  | 11.9  |
| 65 | September | 50 | 5  | 10.88 |
| 65 | September | 50 | 8  | 10.56 |
| 65 | September | 50 | 15 | 9.94  |
| 66 | September | 1  | 2  | 14.39 |

|    |           |    |    |       |
|----|-----------|----|----|-------|
| 66 | September | 1  | 5  | 17.62 |
| 66 | September | 1  | 8  | 14.02 |
| 66 | September | 1  | 15 | 12.5  |
| 66 | September | 10 | 2  | 16.25 |
| 66 | September | 10 | 5  | 15.78 |
| 66 | September | 10 | 8  | 15.26 |
| 66 | September | 10 | 15 | 15.95 |
| 66 | September | 30 | 2  | 15.65 |
| 66 | September | 30 | 5  | 13.51 |
| 66 | September | 30 | 8  | 12.37 |
| 66 | September | 30 | 15 | 12.4  |
| 66 | September | 50 | 2  | 13.2  |
| 66 | September | 50 | 5  | 12.79 |
| 66 | September | 50 | 8  | 11.18 |
| 66 | September | 50 | 15 | 10.82 |
| 67 | September | 1  | 2  | 17.54 |
| 67 | September | 1  | 5  | 19.59 |
| 67 | September | 1  | 8  | 19.08 |
| 67 | September | 1  | 15 | 18.9  |
| 67 | September | 10 | 2  | 11.82 |
| 67 | September | 10 | 5  | 11.83 |
| 67 | September | 10 | 8  | 11.04 |
| 67 | September | 10 | 15 | 10.71 |
| 67 | September | 30 | 2  | 9.46  |
| 67 | September | 30 | 5  | 8.84  |
| 67 | September | 30 | 8  | 7.56  |
| 67 | September | 30 | 15 | 8.58  |
| 67 | September | 50 | 2  | 8.46  |
| 67 | September | 50 | 5  | 7.62  |
| 67 | September | 50 | 8  | 7.63  |
| 67 | September | 50 | 15 | 7.79  |
| 68 | September | 1  | 2  | 11.91 |
| 68 | September | 1  | 5  | 17.76 |

|    |           |    |    |       |
|----|-----------|----|----|-------|
| 68 | September | 1  | 8  | 14.95 |
| 68 | September | 1  | 15 | 13.96 |
| 68 | September | 10 | 2  | 16.57 |
| 68 | September | 10 | 5  | 14.87 |
| 68 | September | 10 | 8  | 14.2  |
| 68 | September | 10 | 15 | 12.25 |
| 68 | September | 30 | 2  | 12.97 |
| 68 | September | 30 | 5  | 11.72 |
| 68 | September | 30 | 8  | 11.62 |
| 68 | September | 30 | 15 | 11.73 |
| 69 | September | 1  | 2  | 12.65 |
| 69 | September | 1  | 5  | 13.28 |
| 69 | September | 1  | 8  | 15.68 |
| 69 | September | 1  | 15 | 13.56 |
| 69 | September | 10 | 2  | 14.09 |
| 69 | September | 10 | 5  | 14.38 |
| 69 | September | 10 | 8  | 14.15 |
| 69 | September | 10 | 15 | 12.09 |
| 69 | September | 30 | 2  | 10.4  |
| 69 | September | 30 | 5  | 11.61 |
| 69 | September | 30 | 8  | 11.51 |
| 69 | September | 30 | 15 | 12.39 |
| 69 | September | 50 | 2  | 9.53  |
| 69 | September | 50 | 5  | 8.98  |
| 69 | September | 50 | 8  | 8.7   |
| 69 | September | 50 | 15 | 8.52  |
| 70 | September | 1  | 2  | 14.77 |
| 70 | September | 1  | 5  | 15.25 |
| 70 | September | 1  | 8  | 14.93 |
| 70 | September | 1  | 15 | 14.84 |
| 70 | September | 10 | 2  | 14.26 |
| 70 | September | 10 | 5  | 13.84 |
| 70 | September | 10 | 8  | 13.1  |



|    |           |    |    |       |
|----|-----------|----|----|-------|
| 70 | September | 10 | 15 | 13.11 |
| 70 | September | 30 | 2  | 9.96  |
| 70 | September | 30 | 5  | 9.64  |
| 70 | September | 30 | 8  | 9.38  |
| 70 | September | 30 | 15 | 8.84  |
| 70 | September | 50 | 2  | 9.21  |
| 70 | September | 50 | 5  | 8.97  |
| 70 | September | 50 | 8  | 8.64  |
| 70 | September | 50 | 15 | 8.87  |
| 71 | September | 1  | 2  | 12.12 |
| 71 | September | 1  | 5  | 14.72 |
| 71 | September | 1  | 8  | 16.88 |
| 71 | September | 1  | 15 | 14.29 |
| 71 | September | 10 | 2  | 12.75 |
| 71 | September | 10 | 5  | 13.01 |
| 71 | September | 10 | 8  | 13.03 |
| 71 | September | 10 | 15 | 14.34 |
| 71 | September | 30 | 2  | 8.89  |
| 71 | September | 30 | 5  | 8.12  |
| 71 | September | 30 | 8  | 7.79  |
| 71 | September | 30 | 15 | 7.96  |
| 75 | October   | 1  | 2  | 12.64 |
| 75 | October   | 1  | 5  | 14.14 |
| 75 | October   | 1  | 8  | 14.83 |
| 75 | October   | 1  | 15 | 11.49 |
| 75 | October   | 10 | 2  | 12.27 |
| 75 | October   | 10 | 5  | 12.94 |
| 75 | October   | 10 | 8  | 12.46 |
| 75 | October   | 10 | 15 | 11.14 |
| 75 | October   | 30 | 2  | 14.47 |
| 75 | October   | 30 | 5  | 13.82 |
| 75 | October   | 30 | 8  | 13.18 |
| 75 | October   | 30 | 15 | 7.51  |

|    |         |    |    |       |
|----|---------|----|----|-------|
| 75 | October | 50 | 2  | 13.21 |
| 75 | October | 50 | 5  | 13.24 |
| 75 | October | 50 | 8  | 13.31 |
| 75 | October | 50 | 15 | 12.59 |
| 76 | October | 1  | 2  | 13.44 |
| 76 | October | 1  | 5  | 12.82 |
| 76 | October | 1  | 8  | 11.59 |
| 76 | October | 1  | 15 | 11.67 |
| 76 | October | 10 | 2  | 13.87 |
| 76 | October | 10 | 5  | 13.09 |
| 76 | October | 10 | 8  | 11.22 |
| 76 | October | 10 | 15 | 11.16 |
| 76 | October | 30 | 2  | 14.08 |
| 76 | October | 30 | 5  | 13.24 |
| 76 | October | 30 | 8  | 13.07 |
| 76 | October | 30 | 15 | 15.65 |
| 76 | October | 50 | 2  | 13.25 |
| 76 | October | 50 | 5  | 11.45 |
| 76 | October | 50 | 8  | 10.19 |
| 76 | October | 50 | 15 | 9.82  |
| 77 | October | 1  | 2  | 16.55 |
| 77 | October | 1  | 5  | 14.3  |
| 77 | October | 1  | 8  | 15.97 |
| 77 | October | 1  | 15 | 12.4  |
| 77 | October | 10 | 2  | 11.89 |
| 77 | October | 10 | 5  | 10.66 |
| 77 | October | 10 | 8  | 10.71 |
| 77 | October | 10 | 15 | 7.37  |
| 77 | October | 30 | 2  | 13.65 |
| 77 | October | 30 | 5  | 12.9  |
| 77 | October | 30 | 8  | 12.53 |
| 77 | October | 30 | 15 | 11.17 |
| 77 | October | 50 | 2  | 13.71 |

|    |         |    |    |       |
|----|---------|----|----|-------|
| 77 | October | 50 | 5  | 13.4  |
| 77 | October | 50 | 8  | 13.52 |
| 77 | October | 50 | 15 | 14.07 |
| 78 | October | 1  | 2  | 18.6  |
| 78 | October | 1  | 5  | 18.48 |
| 78 | October | 1  | 8  | 17.29 |
| 78 | October | 1  | 15 | 15.54 |
| 78 | October | 10 | 2  | 17.08 |
| 78 | October | 10 | 5  | 16.49 |
| 78 | October | 10 | 8  | 15.77 |
| 78 | October | 10 | 15 | 16.36 |
| 78 | October | 30 | 2  | 13.59 |
| 78 | October | 30 | 5  | 13.61 |
| 78 | October | 30 | 8  | 13.32 |
| 78 | October | 30 | 15 | 18.12 |
| 78 | October | 50 | 2  | 9     |
| 78 | October | 50 | 5  | 7.65  |
| 78 | October | 50 | 8  | 8.56  |
| 78 | October | 50 | 15 | 12.07 |
| 79 | October | 1  | 2  | 14.47 |
| 79 | October | 1  | 5  | 10.26 |
| 79 | October | 1  | 8  | 12.43 |
| 79 | October | 1  | 15 | 16.92 |
| 79 | October | 10 | 2  | 17.01 |
| 79 | October | 10 | 5  | 15.57 |
| 79 | October | 10 | 8  | 15.34 |
| 79 | October | 10 | 15 | 17.52 |
| 79 | October | 30 | 2  | 16.13 |
| 79 | October | 30 | 5  | 15.71 |
| 79 | October | 30 | 8  | 14.8  |
| 79 | October | 30 | 15 | 9.75  |
| 79 | October | 50 | 2  | 11.52 |
| 79 | October | 50 | 5  | 10.81 |

|    |         |    |    |       |
|----|---------|----|----|-------|
| 79 | October | 50 | 8  | 10.03 |
| 79 | October | 50 | 15 | 11.41 |
| 80 | October | 1  | 2  | 17.86 |
| 80 | October | 1  | 5  | 15.94 |
| 80 | October | 1  | 8  | 15.29 |
| 80 | October | 1  | 15 | 16.52 |
| 80 | October | 10 | 2  | 17.53 |
| 80 | October | 10 | 5  | 16.07 |
| 80 | October | 10 | 8  | 16.32 |
| 80 | October | 10 | 15 | 15.3  |
| 80 | October | 30 | 2  | 19.13 |
| 80 | October | 30 | 5  | 18.27 |
| 80 | October | 30 | 8  | 16.62 |
| 80 | October | 30 | 15 | 14.72 |
| 80 | October | 50 | 2  | 13.76 |
| 80 | October | 50 | 5  | 12.95 |
| 80 | October | 50 | 8  | 13.22 |
| 80 | October | 50 | 15 | 15.31 |
| 81 | October | 1  | 2  | 18.14 |
| 81 | October | 1  | 5  | 15.12 |
| 81 | October | 1  | 8  | 16.7  |
| 81 | October | 1  | 15 | 19.94 |
| 81 | October | 10 | 2  | 19.17 |
| 81 | October | 10 | 5  | 16.79 |
| 81 | October | 10 | 8  | 17.59 |
| 81 | October | 10 | 15 | 20.25 |
| 81 | October | 30 | 2  | 15.39 |
| 81 | October | 30 | 5  | 14.36 |
| 81 | October | 30 | 8  | 16.68 |
| 81 | October | 30 | 15 | 14.12 |
| 81 | October | 50 | 2  | 14.49 |
| 81 | October | 50 | 5  | 14.04 |
| 81 | October | 50 | 8  | 12.97 |

|    |         |    |    |       |
|----|---------|----|----|-------|
| 81 | October | 50 | 15 | 17.13 |
| 82 | October | 1  | 2  | 23.22 |
| 82 | October | 1  | 5  | 21.34 |
| 82 | October | 1  | 8  | 20.4  |
| 82 | October | 1  | 15 | 22.39 |
| 82 | October | 10 | 2  | 14.33 |
| 82 | October | 10 | 5  | 13.45 |
| 82 | October | 10 | 8  | 15.56 |
| 82 | October | 10 | 15 | 17.45 |
| 82 | October | 30 | 2  | 13.54 |
| 82 | October | 30 | 5  | 12.55 |
| 82 | October | 30 | 8  | 12.42 |
| 82 | October | 30 | 15 | 13.89 |
| 82 | October | 50 | 2  | 19.02 |
| 82 | October | 50 | 5  | 11.5  |
| 82 | October | 50 | 8  | 10.71 |
| 82 | October | 50 | 15 | 13.46 |
| 83 | October | 1  | 2  | 20.4  |
| 83 | October | 1  | 5  | 18.91 |
| 83 | October | 1  | 8  | 20.88 |
| 83 | October | 1  | 15 | 20.25 |
| 83 | October | 10 | 2  | 13.35 |
| 83 | October | 10 | 5  | 11.9  |
| 83 | October | 10 | 8  | 12.4  |
| 83 | October | 10 | 15 | 14.69 |
| 83 | October | 30 | 2  | 10.12 |
| 83 | October | 30 | 5  | 10.47 |
| 83 | October | 30 | 8  | 10.62 |
| 83 | October | 30 | 15 | 12.94 |
| 83 | October | 50 | 2  | 14.18 |
| 83 | October | 50 | 5  | 11.78 |
| 83 | October | 50 | 8  | 9.91  |
| 83 | October | 50 | 15 | 10.81 |

|    |         |    |    |       |
|----|---------|----|----|-------|
| 84 | October | 1  | 2  | 21.98 |
| 84 | October | 1  | 5  | 23.6  |
| 84 | October | 1  | 8  | 21.99 |
| 84 | October | 1  | 15 | 22.09 |
| 84 | October | 10 | 2  | 16.35 |
| 84 | October | 10 | 5  | 16.02 |
| 84 | October | 10 | 8  | 16.75 |
| 84 | October | 10 | 15 | 18.63 |
| 84 | October | 30 | 2  | 20.23 |
| 84 | October | 30 | 5  | 17.5  |
| 84 | October | 30 | 8  | 17.06 |
| 84 | October | 30 | 15 | 17.93 |
| 84 | October | 50 | 2  | 11.09 |
| 84 | October | 50 | 5  | 10.39 |
| 84 | October | 50 | 8  | 8.67  |
| 84 | October | 50 | 15 | 13.62 |
| 85 | October | 1  | 2  | 21.45 |
| 85 | October | 1  | 5  | 24.01 |
| 85 | October | 1  | 8  | 24.59 |
| 85 | October | 1  | 15 | 21.96 |
| 85 | October | 10 | 2  | 21.47 |
| 85 | October | 10 | 5  | 20.95 |
| 85 | October | 10 | 8  | 22.4  |
| 85 | October | 10 | 15 | 20.98 |
| 85 | October | 30 | 2  | 18.54 |
| 85 | October | 30 | 5  | 17.08 |
| 85 | October | 30 | 8  | 17.26 |
| 85 | October | 30 | 15 | 16.74 |
| 85 | October | 50 | 2  | 14.24 |
| 85 | October | 50 | 5  | 13.65 |
| 85 | October | 50 | 8  | 13.62 |
| 85 | October | 50 | 15 | 15.36 |
| 86 | October | 1  | 2  | 18.84 |

|    |         |    |    |       |
|----|---------|----|----|-------|
| 86 | October | 1  | 5  | 17.83 |
| 86 | October | 1  | 8  | 20.79 |
| 86 | October | 1  | 15 | 21.37 |
| 86 | October | 10 | 2  | 20.84 |
| 86 | October | 10 | 5  | 20.86 |
| 86 | October | 10 | 8  | 20.61 |
| 86 | October | 10 | 15 | 20.6  |
| 86 | October | 30 | 2  | 13.74 |
| 86 | October | 30 | 5  | 13.81 |
| 86 | October | 30 | 8  | 13.67 |
| 86 | October | 30 | 15 | 14.82 |
| 86 | October | 50 | 2  | 13.59 |
| 86 | October | 50 | 5  | 10.64 |
| 86 | October | 50 | 8  | 10.24 |
| 86 | October | 50 | 15 | 9.8   |

**Data set of rH values in plain sediment (control)**

| Core | Time  | Sediment depth (cm) | rH      |
|------|-------|---------------------|---------|
| 1    | April | 30                  | 11.0609 |
| 1    | April | 10                  | 14.4181 |
| 1    | April | 1                   | 14.2347 |
| 1    | April | 50                  | 8.72855 |
| 2    | April | 50                  | 9.38541 |
| 2    | April | 1                   | 15.377  |
| 2    | April | 10                  | 10.244  |
| 2    | April | 30                  | 8.94383 |
| 3    | April | 30                  | 8.29761 |
| 3    | April | 1                   | 15.903  |
| 3    | April | 50                  | 8.03633 |
| 3    | April | 10                  | 11.7651 |
| 4    | April | 50                  | 6.86696 |
| 4    | April | 1                   | 12.6244 |
| 4    | April | 10                  | 7.98171 |
| 4    | April | 30                  | 7.03375 |
| 5    | April | 50                  | 8.17289 |
| 5    | April | 1                   | 19.3456 |
| 5    | April | 10                  | 16.9128 |
| 5    | April | 30                  | 13.9586 |
| 6    | April | 50                  | 6.92554 |
| 6    | April | 10                  | 18.5797 |
| 6    | April | 30                  | 9.14307 |
| 6    | April | 1                   | 19.1341 |
| 7    | April | 50                  | 15.1893 |
| 7    | April | 30                  | 16.1562 |
| 7    | April | 10                  | 14.5757 |
| 7    | April | 1                   | 16.3548 |
| 8    | April | 1                   | 22.313  |
| 8    | April | 50                  | 8.76967 |
| 8    | April | 30                  | 12.809  |
| 8    | April | 10                  | 23.4402 |
| 9    | April | 50                  | 7.47597 |
| 9    | April | 1                   | 15.4164 |
| 9    | April | 10                  | 14.0427 |
| 9    | April | 30                  | 7.61729 |
| 10   | April | 1                   | 19.0607 |
| 10   | April | 50                  | 6.71663 |
| 10   | April | 30                  | 8.15151 |
| 10   | April | 10                  | 14.9915 |
| 11   | April | 50                  | 7.28664 |
| 11   | April | 1                   | 16.2322 |
| 11   | April | 30                  | 7.95815 |
| 11   | April | 10                  | 14.5816 |
| 12   | April | 1                   | 17.1854 |
| 12   | April | 10                  | 17.2324 |
| 12   | April | 50                  | 7.22016 |



|    |           |    |         |
|----|-----------|----|---------|
| 12 | April     | 30 | 10.7003 |
| 13 | July      | 1  | 13.6826 |
| 13 | July      | 50 | 7.05174 |
| 13 | July      | 30 | 7.37857 |
| 13 | July      | 10 | 10.974  |
| 14 | July      | 10 | 17.1454 |
| 14 | July      | 50 | 7.0918  |
| 14 | July      | 1  | 19.0541 |
| 14 | July      | 30 | 7.39881 |
| 15 | July      | 50 | 7.67887 |
| 15 | July      | 1  | 13.4896 |
| 15 | July      | 10 | 14.7233 |
| 15 | July      | 30 | 8.09923 |
| 16 | July      | 50 | 7.16247 |
| 16 | July      | 30 | 7.48979 |
| 16 | July      | 1  | 20.8174 |
| 16 | July      | 10 | 12.9926 |
| 17 | July      | 50 | 8.0345  |
| 17 | July      | 30 | 7.73215 |
| 17 | July      | 1  | 18.0535 |
| 17 | July      | 10 | 16.2479 |
| 18 | July      | 1  | 16.0294 |
| 18 | July      | 10 | 14.0242 |
| 18 | July      | 30 | 8.20064 |
| 18 | July      | 50 | 7.4775  |
| 19 | July      | 30 | 16.9313 |
| 19 | July      | 50 | 11.7612 |
| 19 | July      | 10 | 20.0863 |
| 19 | July      | 1  | 18.6905 |
| 20 | July      | 50 | 7.89567 |
| 20 | July      | 30 | 11.7154 |
| 20 | July      | 10 | 12.3612 |
| 20 | July      | 1  | 10.6154 |
| 21 | July      | 50 | 7.44209 |
| 21 | July      | 1  | 15.8221 |
| 21 | July      | 10 | 16.3669 |
| 21 | July      | 30 | 8.37579 |
| 22 | July      | 30 | 8.15288 |
| 22 | July      | 10 | 14.0923 |
| 22 | July      | 1  | 17.0669 |
| 22 | July      | 50 | 7.06561 |
| 23 | July      | 10 | 18.2017 |
| 23 | July      | 30 | 18.7658 |
| 23 | July      | 50 | 12.7043 |
| 23 | July      | 1  | 18.8021 |
| 24 | July      | 1  | 17.4269 |
| 24 | July      | 10 | 16.508  |
| 24 | July      | 30 | 9.64118 |
| 24 | July      | 50 | 8.30757 |
| 25 | September | 10 | 8.306   |

|    |           |    |         |
|----|-----------|----|---------|
| 25 | September | 50 | 7.20522 |
| 25 | September | 30 | 7.23863 |
| 25 | September | 1  | 12.7824 |
| 26 | September | 30 | 7.77228 |
| 26 | September | 1  | 16.0311 |
| 26 | September | 10 | 15.1571 |
| 26 | September | 50 | 7.31875 |
| 27 | September | 30 | 9.64678 |
| 27 | September | 1  | 16.4381 |
| 27 | September | 10 | 17.1314 |
| 27 | September | 50 | 7.65881 |
| 28 | September | 10 | 14.9102 |
| 28 | September | 50 | 7.58552 |
| 28 | September | 1  | 19.8612 |
| 28 | September | 30 | 9.85331 |
| 29 | September | 10 | 21.688  |
| 29 | September | 30 | 10.1606 |
| 29 | September | 50 | 8.44606 |
| 29 | September | 1  | 19.8074 |
| 30 | September | 1  | 16.8651 |
| 30 | September | 30 | 7.37204 |
| 30 | September | 10 | 17.3452 |
| 30 | September | 50 | 7.10516 |
| 31 | September | 1  | 12.8838 |
| 31 | September | 10 | 10.0762 |
| 31 | September | 30 | 8.01829 |
| 31 | September | 50 | 7.6975  |
| 32 | September | 10 | 18.02   |
| 32 | September | 30 | 14.4781 |
| 32 | September | 50 | 8.07215 |
| 32 | September | 1  | 24.3585 |
| 33 | September | 50 | 8.17293 |
| 33 | September | 30 | 13.7634 |
| 33 | September | 10 | 16.1587 |
| 33 | September | 1  | 12.0263 |
| 34 | September | 10 | 21.5046 |
| 34 | September | 30 | 7.54924 |
| 34 | September | 50 | 7.48706 |
| 34 | September | 1  | 22.516  |
| 35 | September | 50 | 7.56427 |
| 35 | September | 30 | 10.2532 |
| 35 | September | 10 | 22.3608 |
| 35 | September | 1  | 21.1881 |
| 36 | September | 50 | 7.20851 |
| 36 | September | 1  | 21.8051 |
| 36 | September | 10 | 14.8154 |
| 36 | September | 30 | 8.44294 |
| 37 | October   | 1  | 23.8509 |
| 37 | October   | 50 | 12.7621 |
| 37 | October   | 30 | 17.4177 |

|    |         |    |         |
|----|---------|----|---------|
| 37 | October | 10 | 23.3012 |
| 38 | October | 50 | 13.6864 |
| 38 | October | 30 | 14.2095 |
| 38 | October | 10 | 22.2624 |
| 38 | October | 1  | 22.8703 |
| 39 | October | 50 | 7.8707  |
| 39 | October | 10 | 16.6969 |
| 39 | October | 1  | 16.2712 |
| 39 | October | 30 | 8.42148 |
| 40 | October | 1  | 19.6369 |
| 40 | October | 10 | 8.85167 |
| 40 | October | 30 | 7.99848 |
| 40 | October | 50 | 6.99624 |
| 41 | October | 1  | 18.0488 |
| 41 | October | 30 | 10.8635 |
| 41 | October | 10 | 18.6432 |
| 41 | October | 50 | 7.6579  |
| 42 | October | 50 | 7.8046  |
| 42 | October | 10 | 17.6223 |
| 42 | October | 1  | 22.9308 |
| 42 | October | 30 | 8.78093 |
| 43 | October | 1  | 21.9463 |
| 43 | October | 10 | 16.3868 |
| 43 | October | 30 | 9.73543 |
| 43 | October | 50 | 11.741  |
| 44 | October | 10 | 17.4864 |
| 44 | October | 50 | 7.64891 |
| 44 | October | 30 | 9.06724 |
| 44 | October | 1  | 21.5729 |
| 45 | October | 1  | 21.9161 |
| 45 | October | 50 | 7.31579 |
| 45 | October | 30 | 14.8871 |
| 45 | October | 10 | 15.8117 |
| 46 | October | 50 | 7.73108 |
| 46 | October | 1  | 19.7502 |
| 46 | October | 10 | 22.0127 |
| 46 | October | 30 | 11.7376 |
| 47 | October | 50 | 7.53591 |
| 47 | October | 1  | 17.9644 |
| 47 | October | 10 | 18.0154 |
| 47 | October | 30 | 10.5647 |
| 48 | October | 30 | 9.9638  |
| 48 | October | 10 | 17.3994 |
| 48 | October | 1  | 16.3674 |
| 48 | October | 50 | 7.10899 |
